# Supplementary material for: Genome-guided prediction of acid resistance mechanisms in acidophilic methanotrophs of phylogenetically deep-rooted Verrucomicrobia isolated from geothermal environments
Source: Front Microbiol. 2022 Sep 23;13:900531. doi: 10.3389/fmicb.2022.900531 (PMC9543262; doi:10.3389/fmicb.2022.900531)
Supplement: Supplementary file 2 [file Table_1.xlsx]

## Sheet: Suppl. Table 1
Supplementary Table 1. Genomic features of all genomes used in the study
ID	NCBI Organism Name	CheckM Completeness	CheckM Contamination	Genome Size	GC Percentage	Assembly Level	Assembly Name	NCBI Taxonomy
GCA_903064525.1	Methylacidimicrobium sp. AP8 (verrucomicrobia)	100	0.68	2300970	64.3	Complete Genome	mthmo	d__Bacteria; p__Verrucomicrobia; c__; o__; f__; g__Methylacidimicrobium; s__Methylacidimicrobium sp. AP8
GCA_017310545.1	Methylacidimicrobium sp. B4	100	0	2371269	63	Complete Genome	ASM1731054v1	d__Bacteria; p__Verrucomicrobia; c__; o__; f__; g__Methylacidimicrobium; s__Methylacidimicrobium sp. B4
GCA_017310505.1	Methylacidiphilum sp. IT6	98.65	1.01	2254698	40	Complete Genome	ASM1731050v1	d__Bacteria; p__Verrucomicrobia; c__Methylacidiphilae; o__Methylacidiphilales; f__Methylacidiphilaceae; g__Methylacidiphilum; s__Methylacidiphilum sp. IT6
GCA_017310525.1	Methylacidiphilum sp. IT5	98.65	0.34	2185606	44	Complete Genome	ASM1731052v1	d__Bacteria; p__Verrucomicrobia; c__Methylacidiphilae; o__Methylacidiphilales; f__Methylacidiphilaceae; g__Methylacidiphilum; s__Methylacidiphilum sp. IT5
GCA_905250085.1	Candidatus Methylacidithermus pantelleriae	98.6	1.3	2466655	55.2	Contig	MPQ17	d__Bacteria; p__Verrucomicrobia; c__Methylacidiphilae; o__Methylacidiphilales; f__Methylacidiphilaceae; g__Candidatus Methylacidithermus; s__Candidatus Methylacidithermus pantelleriae
GCF_000019665.1	Methylacidiphilum infernorum V4	98.65	0.34	2287145	45.48	Complete Genome	ASM1966v1	d__Bacteria; p__Verrucomicrobia; c__Methylacidiphilae; o__Methylacidiphilales; f__Methylacidiphilaceae; g__Methylacidiphilum; s__Methylacidiphilum infernorum
GCF_000297415.1	Methylacidiphilum fumariolicum SolV	99.32	0.34	2365421	40.91	Contig	ASM29741v1	d__Bacteria; p__Verrucomicrobia; c__Methylacidiphilae; o__Methylacidiphilales; f__Methylacidiphilaceae; g__Methylacidiphilum; s__Methylacidiphilum fumariolicum
GCF_000379365.1	Verrucomicrobium sp. 3C	97.93	0.68	2772066	60.89	Scaffold	ASM37936v1	d__Bacteria; p__Verrucomicrobia; c__Verrucomicrobiae; o__Verrucomicrobiales; f__Verrucomicrobiaceae; g__Verrucomicrobium; s__
GCF_000526255.1	Verrucomicrobia bacterium LP2A	98.65	0.68	2465519	62.74	Contig	ASM52625v1	d__Bacteria; p__Verrucomicrobia; c__; o__; f__; g__; s__
GCF_000817245.1	Methylacidiphilum kamchatkense Kam1	98.42	1.01	2210643	40.4	Contig	ASM81724v1	d__Bacteria; p__Verrucomicrobia; c__Methylacidiphilae; o__Methylacidiphilales; f__Methylacidiphilaceae; g__Methylacidiphilum; s__Methylacidiphilum kamchatkense
GCF_000953475.1	Methylacidiphilum fumariolicum SolV	99.32	1.01	2476671	41.48	Complete Genome	MfumSolVChr1	d__Bacteria; p__Verrucomicrobia; c__Methylacidiphilae; o__Methylacidiphilales; f__Methylacidiphilaceae; g__Methylacidiphilum; s__Methylacidiphilum fumariolicum
GCF_004421155.1	Methylacidiphilum fumariolicum	99.32	0.34	2392263	41.02	Scaffold	ASM442115v1	d__Bacteria; p__Verrucomicrobia; c__Methylacidiphilae; o__Methylacidiphilales; f__Methylacidiphilaceae; g__Methylacidiphilum; s__Methylacidiphilum fumariolicum
GCF_004421165.1	Methylacidiphilum fumariolicum	99.32	0.34	2376773	41	Scaffold	ASM442116v1	d__Bacteria; p__Verrucomicrobia; c__Methylacidiphilae; o__Methylacidiphilales; f__Methylacidiphilaceae; g__Methylacidiphilum; s__Methylacidiphilum fumariolicum
GCF_004421175.1	Methylacidiphilum fumariolicum	99.32	0.34	2381209	41	Scaffold	ASM442117v1	d__Bacteria; p__Verrucomicrobia; c__Methylacidiphilae; o__Methylacidiphilales; f__Methylacidiphilaceae; g__Methylacidiphilum; s__Methylacidiphilum fumariolicum
GCF_004421185.1	Methylacidiphilum sp. Yel	97.3	1.69	2250350	41.1	Scaffold	ASM442118v1	d__Bacteria; p__Verrucomicrobia; c__Methylacidiphilae; o__Methylacidiphilales; f__Methylacidiphilaceae; g__Methylacidiphilum; s__
GCF_004421195.1	Methylacidiphilum fumariolicum	99.32	0.34	2391355	41.03	Scaffold	ASM442119v1	d__Bacteria; p__Verrucomicrobia; c__Methylacidiphilae; o__Methylacidiphilales; f__Methylacidiphilaceae; g__Methylacidiphilum; s__Methylacidiphilum fumariolicum
GCF_004421255.1	Methylacidiphilum sp. Phi	99.32	3.38	2337855	41.38	Scaffold	ASM442125v1	d__Bacteria; p__Verrucomicrobia; c__Methylacidiphilae; o__Methylacidiphilales; f__Methylacidiphilaceae; g__Methylacidiphilum; s__
GCF_007475525.1	Methylacidiphilum kamchatkense Kam1	98.62	0.34	2202032	40.34	Complete Genome	ASM747552v1	d__Bacteria; p__Verrucomicrobia; c__Methylacidiphilae; o__Methylacidiphilales; f__Methylacidiphilaceae; g__Methylacidiphilum; s__Methylacidiphilum kamchatkense
GCF_902143375.2	Methylacidimicrobium tartarophylax	97.97	1.35	2327085	61.16	Contig	4A_2	d__Bacteria; p__Verrucomicrobia; c__; o__; f__; g__Methylacidimicrobium; s__Methylacidimicrobium tartarophylax
GCF_902143385.2	Methylacidimicrobium cyclopophantes	98.65	0.68	2276790	61.19	Contig	3B_2	d__Bacteria; p__Verrucomicrobia; c__; o__; f__; g__Methylacidimicrobium; s__Methylacidimicrobium cyclopophantes
GCF_000020225.1	Akkermansia muciniphila ATCC BAA-835	97.96	0	2664102	55.76	Complete Genome	ASM2022v1	d__Bacteria; p__Verrucomicrobia; c__Verrucomicrobiae; o__Verrucomicrobiales; f__Akkermansiaceae; g__Akkermansia; s__Akkermansia muciniphila
GCF_000172155.1	Verrucomicrobium spinosum DSM 4136 = JCM 18804	100	2.72	8220857	60.31	Complete Genome	ASM17215v1	d__Bacteria; p__Verrucomicrobia; c__Verrucomicrobiae; o__Verrucomicrobiales; f__Verrucomicrobiaceae; g__Verrucomicrobium; s__Verrucomicrobium spinosum
GCF_000378105.1	Rubritalea marina DSM 17716	100	0.68	3013271	51.56	Scaffold	ASM37810v1	d__Bacteria; p__Verrucomicrobia; c__Verrucomicrobiae; o__Verrucomicrobiales; f__Rubritaleaceae; g__Rubritalea; s__Rubritalea marina
GCF_001683795.1	Akkermansia glycaniphila	91.84	4.76	3157849	57.68	Scaffold	ASM168379v1	d__Bacteria; p__Verrucomicrobia; c__Verrucomicrobiae; o__Verrucomicrobiales; f__Akkermansiaceae; g__Akkermansia; s__Akkermansia glycaniphila
GCF_002954445.1	Rubritalea profundi	99.18	2.04	4167407	49.43	Scaffold	ASM295444v1	d__Bacteria; p__Verrucomicrobia; c__Verrucomicrobiae; o__Verrucomicrobiales; f__Rubritaleaceae; g__Rubritalea; s__Rubritalea profundi
GCF_003315205.1	Roseimicrobium gellanilyticum	99.32	4.99	7930206	59.67	Scaffold	ASM331520v1	d__Bacteria; p__Verrucomicrobia; c__Verrucomicrobiae; o__Verrucomicrobiales; f__Verrucomicrobiaceae; g__Roseimicrobium; s__Roseimicrobium gellanilyticum
GCF_004364345.1	Prosthecobacter fusiformis	100	0.68	5828112	56.68	Scaffold	ASM436434v1	d__Bacteria; p__Verrucomicrobia; c__Verrucomicrobiae; o__Verrucomicrobiales; f__Verrucomicrobiaceae; g__Prosthecobacter; s__Prosthecobacter fusiformis
GCF_005780165.1	Phragmitibacter flavus	99.14	1.36	5910933	56.88	Contig	ASM578016v1	d__Bacteria; p__Verrucomicrobia; c__Verrucomicrobiae; o__Verrucomicrobiales; f__Verrucomicrobiaceae; g__Phragmitibacter; s__Phragmitibacter flavus
GCF_007992435.1	Brevifollis gellanilyticus	100	2.27	7648353	59.93	Contig	ASM799243v1	d__Bacteria; p__Verrucomicrobia; c__Verrucomicrobiae; o__Verrucomicrobiales; f__Verrucomicrobiaceae; g__Brevifollis; s__Brevifollis gellanilyticus
GCF_014201715.1	Haloferula luteola	97.82	1.36	4904795	58.99	Scaffold	ASM1420171v1	d__Bacteria; p__Verrucomicrobia; c__Verrucomicrobiae; o__Verrucomicrobiales; f__Verrucomicrobiaceae; g__Haloferula; s__Haloferula luteola
GCF_900141815.1	Rubritalea squalenifaciens DSM 18772	99.32	1.36	4322488	51.97	Scaffold	IMG-taxon 2582581871 annotated assembly	d__Bacteria; p__Verrucomicrobia; c__Verrucomicrobiae; o__Verrucomicrobiales; f__Rubritaleaceae; g__Rubritalea; s__Rubritalea squalenifaciens
GCF_900167535.1	Prosthecobacter debontii	100	1.36	6292356	56.49	Scaffold	IMG-taxon 2590828807 annotated assembly	d__Bacteria; p__Verrucomicrobia; c__Verrucomicrobiae; o__Verrucomicrobiales; f__Verrucomicrobiaceae; g__Prosthecobacter; s__Prosthecobacter debontii
GCF_000173075.1	Chthoniobacter flavus Ellin428	97.3	2.87	7848700	61.06	Scaffold	ASM17307v1	d__Bacteria; p__Verrucomicrobia; c__Spartobacteria; o__Chthoniobacterales; f__Chthoniobacteraceae; g__Chthoniobacter; s__Chthoniobacter flavus
GCF_001613545.1	Terrimicrobium sacchariphilum	100	2.7	4751807	60.19	Contig	ASM161354v1	d__Bacteria; p__Verrucomicrobia; c__Terrimicrobia; o__Terrimicrobiales; f__Terrimicrobiaceae; g__Terrimicrobium; s__Terrimicrobium sacchariphilum
GCF_000019965.1	Opitutus terrae PB90-1	99.32	3.42	5957605	65.34	Complete Genome	ASM1996v1	d__Bacteria; p__Verrucomicrobia; c__Opitutae; o__Opitutales; f__Opitutaceae; g__Opitutus; s__Opitutus terrae
GCF_000171235.2	Geminisphaera colitermitum TAV2	98.06	0.5	5671497	60.93	Contig	ASM17123v2	d__Bacteria; p__Verrucomicrobia; c__Opitutae; o__Opitutales; f__Opitutaceae; g__Geminisphaera; s__Geminisphaera colitermitum
GCF_001580015.1	Cephaloticoccus primus	97.26	0	2356970	63.03	Contig	ASM158001v1	d__Bacteria; p__Verrucomicrobia; c__Opitutae; o__Opitutales; f__Opitutaceae; g__Cephaloticoccus; s__Cephaloticoccus primus
GCF_001580045.1	Cephaloticoccus capnophilus	97.95	0	2092503	60.54	Contig	ASM158004v1	d__Bacteria; p__Verrucomicrobia; c__Opitutae; o__Opitutales; f__Opitutaceae; g__Cephaloticoccus; s__Cephaloticoccus capnophilus
GCF_001746835.1	Lacunisphaera limnophila	99.32	2.7	4199284	66.48	Complete Genome	ASM174683v1	d__Bacteria; p__Verrucomicrobia; c__Opitutae; o__Opitutales; f__Opitutaceae; g__Lacunisphaera; s__Lacunisphaera limnophila
GCF_002310495.1	Nibricoccus aquaticus	99.32	0.68	4730447	62.25	Complete Genome	ASM231049v1	d__Bacteria; p__Verrucomicrobia; c__Opitutae; o__Opitutales; f__Opitutaceae; g__Nibricoccus; s__Nibricoccus aquaticus
GCF_003096195.1	Ereboglobus luteus	93.81	0.68	4175033	59.67	Complete Genome	ASM309619v1	d__Bacteria; p__Verrucomicrobia; c__Opitutae; o__Opitutales; f__Opitutaceae; g__Ereboglobus; s__Ereboglobus luteus
GCF_004118375.1	Oleiharenicola lentus	99.32	2.03	4713391	65.3	Contig	ASM411837v1	d__Bacteria; p__Verrucomicrobia; c__Opitutae; o__Opitutales; f__Opitutaceae; g__Oleiharenicola; s__Oleiharenicola lentus
GCF_007559335.1	Rariglobus hedericola	98.63	0.68	4146955	60.63	Contig	ASM755933v1	d__Bacteria; p__Verrucomicrobia; c__Opitutae; o__Opitutales; f__Opitutaceae; g__Rariglobus; s__Rariglobus hedericola
GCF_014230145.1	Pelagicoccus albus	99.32	1.35	4768689	52.27	Contig	ASM1423014v1	d__Bacteria; p__Verrucomicrobia; c__Opitutae; o__Puniceicoccales; f__Puniceicoccaceae; g__Pelagicoccus; s__Pelagicoccus albus
GCF_011044775.1	Limisphaera ngatamarikiensis	97.97	2.06	3908748	64.95	Scaffold	ASM1104477v1	d__Bacteria; p__Verrucomicrobia; c__Verrucomicrobiae; o__Verrucomicrobiales; f__Verrucomicrobia subdivision 3; g__Limisphaera; s__Limisphaera ngatamarikiensis

## Sheet: Suppl. Table 2
Supplementary Table 2. Protein domain functional annotations
Gene Name	PFAM	TIGRFAM	KO	IPRO	Panther
AdiA	PF01276	TIGR00286	K01584	IPR000310	PTHR45229
AdiC	PF13520	TIGR00905	K03759	IPR002293	PTHR42770
SpeA	PF17810	TIGR01273	K01585	IPR002985	PTHR43295
cadA	PF01276		K01582	IPR011193	PTHR43643
cadB	PF13520	TIGR00905	K03757	IPR002293	PTHR42770
SpeC	PF01276		K01581	IPR011193	PTHR45229
SpeF	PF01276		K01581	IPR011193	PTHR45229
potE	PF13520	TIGR04299	K03756	IPR002293	PTHR42770
gadA	PF00282	TIGR01788	K01580	IPR010107	PTHR43321
gadB	PF00282	TIGR01788	K01580	IPR010107	PTHR43321
gadC	PF13520	TIGR00910	K20265	IPR004759	PTHR42770
slp	PF03843	TIGR00752	K07285	IPR004658	PTHR37530
argI	PF00185	TIGR00658	K00611	IPR002292	PTHR45753
arcC	PF00696	TIGR00746	K00926	IPR003964	PTHR30409
aguA	PF04371	TIGR03380	K10536	IPR007466	PTHR31377
aguB	PF00795	TIGR03381	K12251	IPR017755	PTHR43674
atpB	PF00119	TIGR01131	K02108	IPR000568	PTHR42823
atpF	PF00430	TIGR01144	K02109	IPR005864	PTHR33445
atpE	PF00137	TIGR01260	K02110	IPR000454	PTHR10031
atpA	PF00006	TIGR00962	K02111	IPR005294	PTHR43089
atpD	PF00006	TIGR01039	K02112	IPR005722	PTHR15184
atpG	PF00231	TIGR01146	K02115	IPR000131	PTHR11693
atpH	PF00213	TIGR01145	K02113	IPR000711	PTHR11910
atpC	PF00401	TIGR01216	K02114	IPR001469	PTHR13822
hpnD	PF00494	TIGR03465	K21678	IPR017828	PTHR31480
hpnC	PF00494	TIGR03464	K21679	IPR017827	PTHR31480
hpnE	PF01593	TIGR03467	K21677	IPR017830	PTHR42923
sps	PF00494		K00801	IPR002060	PTHR11626
hpnF	PF13243	TIGR01507	K06045	IPR006400	PTHR11764
hpnP	PF02310		K22705	IPR034530	PTHR43409
hpnH	PF11946	TIGR03470		IPR017833	PTHR11228
hpnG	PF01048	TIGR03468		IPR017831	PTHR46832
hpnB	PF00535	TIGR03469		IPR017832	PTHR43646
hpnR	PF02310	TIGR04367	K22704	IPR027564	PTHR43409
HpnI	PF13506	TIGR03472	K00720	IPR017835	PTHR12726
HpnK	PF04794	TIGR03473		IPR017836	PTHR31609
HpnJ	PF04055	TIGR03471		IPR017834	PTHR43409
HpnM	PF05494		K07323	IPR017842	PTHR36573
HpnA	PF01370	TIGR03466		IPR017829	PTHR43000
HpnN	PF03176	TIGR03480	K07003	IPR017841	PTHR33406
hpnO	PF00202			IPR005814
kdpC	PF02669	TIGR00681	K01548	IPR003820	PTHR30042
kdpA	PF03814	TIGR00680	K01546	IPR004623	PTHR30607
kdpB		TIGR01497	K01547	IPR006391	PTHR43743
kdpD	PF02702		K07646	IPR003852	PTHR45569
kdpE	PF00072			IPR001789	PTHR48111
kdpF	PF09604	TIGR02115		IPR011726
kch	PF02254		K10716	IPR003148	PTHR43833
kup	PF02705			IPR003855	PTHR30540
nhaA	PF06965	TIGR00773	K03313	IPR004670	PTHR30341
cna	PF01699			IPR004837
chaC	PF04752			IPR006840	PTHR12192
Nhe2	PF00999			IPR018422	PTHR10110
can	PF00484			IPR001765	PTHR43175
speE	PF17284	TIGR00417	K00797	IPR001045	PTHR11558
speH	PF02675	TIGR03330	K01611	IPR003826	PTHR33866
pstS	PF12849	TIGR00975	K02040	IPR005673	PTHR42996
pstC	PF00528	TIGR02138	K02037	IPR011864	PTHR30425
pstA	PF00528	TIGR00974	K02038	IPR005672	PTHR42922
pstB	PF00005	TIGR00972	K02036	IPR005670	PTHR43423

## Sheet: Suppl. Table 3
Supplementary Table 3. Acid resistance related proteins and orthogroups found in Verrucomicrobia Genomes
*in blue letters are annotation manually curated. MA=miss annotated
	Orthogroup	Limisphaera_ngatamarikiensis	Ca._Methylacidithermus_pantelleriae	Methylacidimicrobium_cyclopophantes	Methylacidimicrobium_tartarophylax	Verrucomicrobium_sp._3C	Methylacidimicrobium_sp._AP8	Verrucomicrobia_bacterium_LP2A	Methylacidimicrobium_sp._B4	Methylacidiphilum_sp._Yel	Methylacidiphilum_fumariolicum_SolV	Methylacidiphilum_kamchatkense_Kam1	Methylacidiphilum_sp._IT5	Methylacidiphilum_infernorum_V4	Methylacidiphilum_sp._IT6	Methylacidiphilum_sp._Phi	Pelagicoccus_albus	Oleiharenicola_lentus	Lacunisphaera_limnophila	Opitutus_terrae_PB90-1	Cephaloticoccus_primus	Cephaloticoccus_capnophilus	Rariglobus_hedericola	Nibricoccus_aquaticus	Ereboglobus_luteus	Geminisphaera_colitermitum_TAV2	Chthoniobacter_flavus_Ellin428	Terrimicrobium_sacchariphilum	Phragmitibacter_flavus	Roseimicrobium_gellanilyticum	Verrucomicrobium_spinosum_DSM_4136	Brevifollis_gellanilyticus	Prosthecobacter_fusiformis	Prosthecobacter_debontii	Akkermansia_muciniphila_ATCC_BAA-835	Akkermansia_glycaniphila	Haloferula_luteola	Rubritalea_squalenifaciens_DSM_18772	Rubritalea_profundi	Rubritalea_marina_DSM_17716
Voltage channel vCh	OG0001427		CAF0694035.1	VVM06531.1	VVM07135.1	WP_018291803.1	CAB4244110.1	WP_024806959.1	QSR84722.1	TFE67634.1	WP_009058500.1	QDQ42604.1	QSR87007.1	ACD83418.1	QSR88766.1	TFE71533.1	MBC2605566.1									WP_052360876.1		GAT32756.1	TLD72263.1	RBP46003.1		GEP45811.1	TDU73313.1	SKB00138.1, SKB03049.1
Kup	OG0001417			VVM06198.1	VVM06183.1	WP_018290248.1	CAB4242730.1											RXK56711.1	AOS45383.1	ACB76395.1, ACB76580.1	KXU35177.1	KXU34930.1	TSJ79706.1	ATC62545.1		WP_043589015.1		GAT32985.1	TLD71841.1	RBP47261.1, RBP47262.1	WP_009960795.1, WP_029190364.1	GEP42893.1, GEP45207.1	TDU70982.1	SKA97037.1
kdpF2	OG0009323									MA	WP_079199496.1	MA	QSR87772.1	MA	QSR89778.1	MA
kdpF	OG0006286			MA	MA	WP_018290414.1	CAB4244504.1	WP_084657092.1	QSR85843.1
kdpA	OG0001178			VVM06021.1	VVM07260.1	WP_018290413.1	CAB4244503.1	WP_024808573.1	QSR84176.1	TFE70909.1	WP_009061979.1	QDQ41298.1	QSR86003.1	ACD82095.1	QSR88060.1	TFE69595.1		RXK55587.1					TSJ78925.1	ATC65339.1			EDY21222.1	GAT35118.1	TLD70245.1	RBP47312.1	WP_009965147.1	GEP42134.1	TDU70643.1	SKA76034.1	ACD04663.1, ACD04976.1	OCA03781.1
kdpB	OG0001110			VVM04912.1, VVM06020.1	VVM07259.1	WP_018290412.1	CAB4244502.1	WP_024808574.1	QSR84177.1	TFE70908.1	WP_009061977.1	QDQ41295.1, QDQ41296.1	QSR86002.1	ACD82094.1	QSR88059.1	TFE69594.1		RXK55586.1					TSJ78926.1	ATC66197.1			EDY21221.1	GAT35117.1	TLD70246.1	RBP47311.1	WP_009965145.1	GEP42133.1	TDU70642.1	SKA76048.1	ACD04664.1, ACD04977.1	OCA03787.1
kdpC	OG0001179			VVM04913.1	VVM07258.1	WP_020494030.1	CAB4244501.1	WP_024808575.1	QSR84178.1	TFE70907.1	WP_009061975.1	QDQ41294.1	QSR86001.1	ACD82093.1	QSR88058.1	TFE69649.1		RXK55585.1					TSJ78927.1	ATC65338.1			EDY21220.1	GAT35116.1	TLD70247.1	RBP47310.1	WP_009965144.1	GEP42132.1	TDU70641.1	SKA76055.1	ACD04665.1, ACD04978.1	OCA03782.1
kdpD	OG0001074			VVM04568.1, VVM07442.1	VVM07920.1	WP_018291922.1	CAB4243449.1	WP_024807417.1	QSR85122.1	TFE70414.1	WP_009059099.1	QDQ42768.1	QSR86564.1	ACD82813.1	QSR89243.1	TFE68509.1		RXK56931.1					TSJ78928.1	ATC65337.1		WP_081721860.1	EDY21219.1	GAT35115.1	TLD70249.1	RBP47308.1	WP_009965141.1	GEP42130.1, GEP42897.1	TDU70640.1	SKA76064.1	ACD04660.1, ACD04979.1	OCA03779.1
nhe2	OG0001132			VVM04446.1, VVM06008.1	VVM06165.1, VVM07894.1, VVM08114.1	WP_018289725.1, WP_018291789.1, WP_018291938.1	CAB4243306.1, CAB4243430.1, CAB4243961.1	WP_024807075.1, WP_024807454.1	QSR84829.1, QSR85140.1	TFE69207.1, TFE70855.1	WP_009058465.1, WP_009060518.1	QDQ41873.1, QDQ41874.1, QDQ42626.1	QSR87792.1	ACD82565.1, ACD83440.1	QSR88750.1, QSR89442.1	TFE66972.1, TFE70832.1
chaA	OG0003001									TFE66888.1	WP_009058295.1, WP_009058296.1	QDQ43103.1	QSR86196.1	ACD82317.1	QSR88227.1	TFE72518.1							TSJ76780.1				EDY19524.1, EDY22123.1
hpnC	OG0002328		CAF0695487.1	VVM05301.1	VVM05667.1	WP_196799492.1	CAB4242686.1	WP_024808730.1	QSR84307.1	TFE69919.1	WP_009060967.1	QDQ41847.1	QSR86330.1	ACD82502.1	QSR88354.1	TFE70742.1
hpnDE	OG0001073	NGO39823.1	CAF0696301.1	VVM07678.1	VVM04417.1	WP_155996501.1	CAB4242442.1	WP_084657072.1	QSR83934.1	TFE70287.1	WP_009061612.1	QDQ43223.1	QSR87597.1	ACD84261.1	QSR87868.1	TFE68945.1				ACB77409.1							EDY20081.1	GAT34129.1	TLD71431.1	RBP47705.1	WP_009963599.1	GEP42985.1	TDU64567.1	SKA98379.1	ACD05286.1	OCA03772.1	MBB5350461.1	SHJ34318.1	PQJ27208.1	WP_018969124.1
hpnF	OG0001917	NGO38986.1	CAF0704519.1	VVM08503.1	VVM05103.1	WP_018290309.1	CAB4242665.1	WP_024808711.1	QSR84291.1	TFE69885.1	WP_009061034.1	QDQ41808.1	QSR86292.1	ACD82457.1	QSR88317.1	TFE70629.1											EDY15838.1	GAT35140.1
hpnH	OG0002009	NGO38080.1	CAF0700745.1	VVM05666.1	VVM06292.1	WP_018290929.1	CAB4244398.1	2540341242 (JGI)	QSR83798.1	TFE69110.1	WP_009060390.1	QDQ41601.1	QSR87428.1	ACD84020.1	QSR89564.1	TFE71160.1											EDY15788.1	GAT35141.1
hpnG	OG0001918	NGO38460.1	CAF0704522.1	VVM08504.1	VVM05102.1	WP_018290308.1	CAB4242666.1	WP_024808712.1	QSR84292.1	TFE69884.1	WP_009061033.1	QDQ41809.1	QSR86293.1	ACD82458.1	QSR88318.1	TFE70630.1											EDY21987.1	GAT33965.1
hpnA	OG0000225	NGO39396.1, NGO40175.1, NGO40444.1	CAF0689310.1	VVM05416.1	VVM04820.1	WP_018290602.1	CAB4244706.1	WP_024808388.1	QSR84004.1	TFE66138.1	WP_009061920.1	QDQ43379.1	QSR85972.1	ACD84529.1	QSR88031.1	TFE69568.1	MBC2604551.1, MBC2606987.1	RXK53017.1, RXK53771.1, RXK54352.1, RXK55708.1	AOS44009.1, AOS44980.1	ACB74145.1, ACB77792.1	KXU38107.1	KXU35035.1	TSJ79679.1	ATC63845.1, ATC63973.1, ATC65583.1	AWI09151.1, AWI10665.1	WP_043586587.1, WP_081722246.1, WP_157836840.1, WP_157837138.1	EDY16802.1, EDY18259.1	GAT32092.1, GAT33125.1		RBP46101.1	WP_009960079.1	GEP41057.1, GEP42502.1, GEP44353.1	TDU63145.1	SKA90357.1			MBB5350930.1
hpnO	OG0000041	NGO39606.1, NGO40247.1	CAF0693871.1, CAF0694012.1, CAF0699132.1	VVM05433.1, VVM06429.1, VVM06858.1, VVM07913.1	VVM04307.1, VVM04335.1, VVM04801.1, VVM06884.1	WP_018291736.1, WP_018291766.1, WP_020494318.1, WP_155996493.1	CAB4243084.1, CAB4244047.1, CAB4244081.1, CAB4244686.1	WP_024806846.1, WP_024806982.1, WP_024807013.1, WP_051460461.1	QSR84634.1, QSR84743.1, QSR85718.1, QSR85824.1	TFE66338.1, TFE66953.1, TFE70455.1, TFE71037.1	WP_009058068.1, WP_009058782.1, WP_009058852.1, WP_009059223.1	QDQ41381.1, QDQ41382.1, QDQ42209.1, QDQ42256.1, QDQ42801.1, QDQ42802.1	QSR86686.1, QSR86727.1, QSR87120.1, QSR87681.1	ACD83002.1, ACD83062.1, ACD83587.1, ACD84414.1	QSR87948.1, QSR89025.1, QSR89067.1, QSR89817.1	TFE66912.1, TFE67057.1, TFE67414.1, TFE68620.1	MBC2607181.1	RXK54633.1	AOS43789.1	ACB73912.1, ACB73979.1, ACB75257.1	KXU38204.1	KXU35618.1	TSJ75735.1, TSJ78742.1, TSJ79407.1	ATC64049.1	AWI08723.1	WP_043589814.1	EDY16619.1, EDY19698.1, EDY19699.1, EDY21243.1, EDY21601.1, EDY21602.1, EDY21603.1	GAT32962.1, GAT33994.1, GAT34774.1	TLD68170.1, TLD70552.1, TLD71517.1	RBP39142.1, RBP45037.1, RBP45437.1	WP_009958246.1, WP_009960526.1	GEP41153.1, GEP43258.1	TDU66527.1, TDU80907.1	SKB01505.1, SKB02077.1	ACD04705.1	OCA02133.1	MBB5351517.1, MBB5352774.1	SHJ40606.1, SHJ92590.1	PQJ29524.1, PQJ30317.1	WP_018970165.1, WP_018971154.1
hpnN	OG0001199	NGO39214.1	CAF0702296.1	VVM07237.1	VVM05711.1	WP_018290256.1	CAB4242724.1	WP_024808764.1	QSR84337.1	TFE67995.1	WP_009060907.1	QDQ42442.1, QDQ42443.1	QSR86893.1	ACD83279.1	QSR88868.1	TFE66220.1											EDY21684.1, EDY21699.1, EDY21700.1	GAT33998.1	TLD71925.1	RBP46305.1	WP_081452634.1	GEP43029.1	TDU66494.1	SKA99264.1			MBB5353091.1
hpnP	OG0002425																			ACB76835.1, ACB77641.1					AWI08920.1, AWI10703.1	WP_052360799.1	EDY20944.1, EDY20945.1, EDY21780.1, EDY21781.1	GAT34517.1								OCA02570.1		SHI82307.1		WP_018968730.1
hpnJ	OG0005667	NGO38831.1																									EDY17743.1, EDY18386.1					GEP41232.1
hpnK	OG0005863																						TSJ78528.1				EDY16389.1		TLD69316.1	RBP45270.1
sps	OG0002048	NGO39152.1																									EDY22294.1	GAT34964.1	TLD70842.1	RBP45725.1	WP_009960701.1	GEP42107.1	TDU69237.1	SKA89038.1	ACD04204.1	OCA02057.1	MBB5352235.1	SHK27760.1	PQJ30125.1	WP_018969340.1
slp	OG0000083		CAF0702151.1, CAF0702154.1	VVM05961.1, VVM07160.1, VVM07161.1, VVM07162.1, VVM07840.1, VVM08073.1	VVM04467.1, VVM04515.1, VVM04713.1, VVM04714.1, VVM04715.1, VVM04716.1, VVM05703.1	WP_018290265.1, WP_018290776.1, WP_018290778.1, WP_018290779.1, WP_040888581.1, WP_081616253.1, WP_196799611.1	CAB4242633.1, CAB4242635.1, CAB4242636.1, CAB4242716.1, CAB4243148.1, CAB4244186.1	WP_024806872.1, WP_024807934.1, WP_024808615.1, WP_024808616.1, WP_024808618.1, WP_024808756.1, WP_038120165.1	QSR84204.1, QSR84205.1, QSR84206.1, QSR84207.1, QSR84331.1, QSR84659.1, QSR85528.1	TFE66923.1, TFE68477.1, TFE69675.1, TFE69898.1	WP_009058835.1, WP_009059287.1, WP_009059773.1, WP_009060460.1, WP_009061061.1	QDQ41562.1, QDQ41794.1, QDQ42222.1, QDQ42546.1, QDQ42849.1	QSR86573.1, QSR86696.1, QSR86969.1, QSR87283.1, QSR87458.1, QSR87459.1	ACD82828.1, ACD83017.1, ACD83362.1, ACD83827.1, ACD84063.1, ACD84064.1	QSR88429.1, QSR88798.1, QSR89056.1, QSR89226.1, QSR89593.1, QSR89745.1	TFE67083.1, TFE67131.1, TFE67473.1, TFE68517.1, TFE71344.1
adiC (AA-permease)	OG0001353	NGO38161.1	CAF0691426.1	VVM06955.1	VVM06369.1	WP_018290394.1	CAB4244478.1	WP_024808641.1	QSR84228.1	TFE71038.1	WP_009059221.1	QDQ42800.1	QSR87119.1	ACD83585.1	QSR88645.1					ACB77188.1							EDY18466.1	GAT34264.1	TLD71038.1	RBP42375.1	WP_009958955.1	GEP42367.1	TDU69285.1	SKA97773.1			MBB5351322.1
GadC (AA-permease)	OG0000348	NGO38038.1, NGO40114.1	CAF0689711.1, CAF0695391.1, CAF0700993.1, CAF0703912.1	VVM07097.1, VVM07964.1	VVM04489.1	WP_018291814.1	CAB4243177.1	WP_024806948.1	QSR85890.1	TFE69909.1	WP_009061093.1	QDQ41783.1	QSR87293.1	ACD83842.1	QSR88410.1	TFE70709.1	MBC2606982.1	RXK56542.1	AOS45640.1						AWI08209.1	WP_043587644.1	EDY17631.1	GAT31937.1, GAT32959.1, GAT34285.1, GAT34385.1	TLD69332.1	RBP37756.1	WP_009965095.1	GEP40752.1, GEP41028.1	TDU68192.1	SKA78312.1	ACD04554.1	OCA02694.1, OCA03553.1	MBB5353602.1		PQJ28651.1
SpeA	OG0000668	NGO39981.1	CAF0701973.1	VVM05514.1	VVM08053.1	WP_018290862.1	CAB4242557.1	WP_024808203.1	QSR83841.1	TFE67373.1	WP_009061510.1	QDQ41471.1	QSR87515.1	ACD84161.1	QSR89645.1	TFE73423.1	MBC2607544.1	RXK56263.1	AOS45594.1	ACB76743.1	KXU34665.1	KXU34176.1	TSJ78198.1	ATC62659.1	AWI09073.1	WP_052361164.1	EDY20546.1	GAT33128.1	TLD69219.1	RBP46139.1	WP_009962444.1	GEP42994.1	TDU72875.1	SKA91958.1	ACD05477.1	OCA03749.1	MBB5352186.1	SHK47195.1	PQJ28330.1	WP_018970676.1
GadA	OG0001835		CAF0703131.1	VVM08298.1, VVM08299.1	VVM06776.1	WP_020494067.1	CAB4242403.1	WP_024808336.1	QSR83958.1	TFE66019.1	WP_009058096.1	QDQ41398.1	QSR86054.1	ACD82162.1	QSR88112.1	TFE68159.1																			ACD04211.1	OCA03784.1
argI	OG0000547	NGO39575.1	CAF0699135.1	VVM05434.1	VVM04800.1	WP_018290625.1	CAB4244685.1	WP_024808406.1	QSR84020.1	TFE66337.1	WP_009058071.1	QDQ41383.1	QSR87759.1	ACD84413.1	QSR87947.1	TFE67058.1	MBC2607180.1	RXK54634.1	AOS43788.1	ACB73978.1	KXU38203.1	KXU35619.1	TSJ79406.1	ATC64052.1	AWI10284.1	WP_043589786.1	EDY21600.1	GAT34775.1	TLD72765.1	RBP45436.1	WP_009960527.1	GEP43257.1	TDU66528.1	SKB02075.1	ACD05572.1	OCA02706.1	MBB5352775.1	SHK27853.1	PQJ30127.1	WP_018969639.1
argI	OG0000466	NGO39344.1	CAF0704552.1	VVM08428.1	VVM05355.1	WP_018292051.1	CAB4243318.1	WP_024807558.1	QSR85237.1	TFE71019.1	WP_009059254.1	QDQ42824.1	QSR87138.1	ACD83618.1	QSR88622.1	TFE66594.1	MBC2605815.1	RXK55509.1	AOS46256.1	ACB75794.1	KXU35783.1	KXU34107.1	TSJ78891.1	ATC62847.1	AWI09620.1	WP_043588057.1	EDY20018.1	GAT34113.1	TLD69852.1	RBP35896.1	WP_009960579.1	GEP45702.1	TDU81340.1	SKB08389.1	ACD03957.1	OCA03594.1	MBB5352024.1, MBB5353179.1	SHK02927.1	PQJ30335.1	WP_205619017.1
aguA	OG0000570	NGO38159.1	CAF0693976.1	VVM04550.1, VVM07842.1	VVM05705.1	WP_018290263.1	CAB4242718.1	WP_084657128.1	QSR85860.1	TFE66925.1	WP_009058832.1	QDQ42224.1	QSR86698.1	ACD83019.1	QSR89054.1	TFE67401.1		RXK56992.1	AOS45570.1	ACB76139.1	KXU34757.1	KXU36052.1	TSJ79727.1	ATC65896.1	AWI10595.1	WP_043586441.1	EDY19277.1	GAT33141.1	TLD71851.1	RBP47283.1	WP_157210801.1	GEP43646.1	TDU66173.1	SKA97116.1	ACD03962.1	OCA02942.1	MBB5351018.1	SHJ76652.1	PQJ29184.1	WP_018968956.1
aguB	OG0000213	NGO40460.1	CAF0693979.1	VVM07841.1	VVM05704.1	WP_020493993.1	CAB4242717.1	WP_024808757.1	QSR85859.1	TFE66924.1	WP_009058833.1	QDQ42223.1	QSR86697.1	ACD83018.1	QSR89055.1	TFE67402.1	MBC2607899.1	RXK56707.1	AOS45569.1	ACB76138.1, ACB76225.1	KXU34750.1	KXU36051.1	TSJ78831.1	ATC62493.1	AWI09766.1	WP_043586443.1	EDY18088.1, EDY19278.1	GAT32922.1, GAT33634.1	TLD68519.1, TLD71850.1	RBP35532.1, RBP45305.1, RBP47282.1	WP_009960094.1, WP_157210919.1	GEP41008.1, GEP43647.1, GEP45906.1	TDU66174.1, TDU70744.1	SKA92342.1, SKA97114.1, SKB02924.1	ACD05927.1	OCA03634.1	MBB5351020.1	SHJ76696.1	PQJ27200.1, PQJ29185.1	WP_018968957.1
atpD	OG0000214	NGO38167.1	CAF0689641.1	VVM05111.1, VVM05932.1	VVM06193.1, VVM07989.1	WP_020494096.1, WP_040887943.1	CAB4243265.1, CAB4244658.1	WP_024808431.1, WP_051460375.1	QSR84043.1, QSR85375.1	TFE70103.1, TFE70204.1	WP_009058960.1, WP_009061833.1	QDQ42151.1, QDQ43332.1	QSR85939.1, QSR86627.1	ACD82894.1, ACD84477.1	QSR87995.1, QSR89121.1	TFE67483.1, TFE69535.1	MBC2607225.1	RXK54339.1	AOS43987.1	ACB74163.1	KXU34132.1	KXU36702.1	TSJ76623.1	ATC64028.1	AWI08258.1	WP_043585047.1	EDY18058.1	GAT33225.1	TLD70426.1	RBP37350.1	WP_009958352.1	GEP44405.1	TDU64604.1	SKA88612.1	ACD04344.1	OCA03664.1	MBB5352911.1	SHI74385.1	PQJ28242.1	WP_018970036.1
atpC	OG0002601			VVM05931.1	VVM05739.1	WP_020493882.1	CAB4243266.1	WP_024807747.1	QSR85374.1	TFE70082.1	WP_009058959.1	QDQ42152.1	QSR86628.1	ACD82895.1	QSR89120.1	TFE67460.1
atpZ	OG0002600			VVM05930.1	VVM05738.1	WP_018289897.1	CAB4243267.1	WP_084656933.1	QSR85373.1	TFE70081.1	WP_009058958.1	QDQ42153.1	QSR86629.1	ACD82896.1	QSR89119.1	TFE67459.1
atpB	OG0002599			VVM05929.1	VVM05737.1	WP_018289896.1	CAB4243268.1	WP_024807745.1	QSR85775.1	TFE70080.1	WP_009058957.1	QDQ42154.1	QSR86630.1	ACD82897.1	QSR89118.1	TFE67458.1
atpE	OG0002598			VVM05928.1	VVM05736.1	WP_020493881.1	CAB4243269.1	WP_024807744.1	QSR85372.1	TFE70079.1	WP_009058956.1	QDQ42155.1	QSR86631.1	ACD82898.1	QSR89117.1	TFE67457.1
atpF	OG0002597			VVM05927.1	VVM05735.1	WP_018289894.1	CAB4243270.1	WP_024807743.1	QSR85371.1	TFE70078.1	WP_009058955.1	QDQ42156.1	QSR86632.1	ACD82899.1	QSR89116.1	TFE67482.1
atpA	OG0002596			VVM05926.1	VVM05734.1	WP_018289893.1	CAB4243271.1	WP_024807742.1	QSR85370.1	TFE70077.1	WP_009058954.1	QDQ42157.1	QSR86633.1	ACD82900.1	QSR89115.1	TFE67456.1
atpG	OG0002595			VVM05925.1	VVM05733.1	WP_018289892.1	CAB4243272.1	WP_024807741.1	QSR85369.1	TFE70076.1	WP_009058953.1	QDQ42158.1	QSR86634.1	ACD82901.1	QSR89114.1	TFE67455.1
atpB	OG0000851	NGO38173.1	CAF0689653.1	VVM06656.1	VVM07979.1	WP_196799517.1	CAB4244664.1	WP_024808425.1	QSR84038.1	TFE70210.1	WP_009061818.1	QDQ43326.1	QSR85933.1	ACD84471.1	QSR87989.1	TFE69529.1	MBC2607219.1	RXK54333.1	AOS43982.1	ACB74169.1		KXU36696.1	TSJ76629.1	ATC66067.1	AWI10459.1	WP_052361604.1	EDY18064.1	GAT33219.1	TLD70431.1	RBP37344.1	WP_009958345.1	GEP44411.1	TDU64597.1	SKA88584.1	ACD04350.1		MBB5352903.1	SHI74111.1	PQJ28248.1	WP_018970042.1
atpE	OG0000661	NGO38172.1	CAF0689651.1	VVM04763.1	VVM07981.1	WP_196799518.1	CAB4244663.1	WP_024808426.1	QSR85826.1	TFE70209.1	WP_009061820.1	QDQ43327.1	QSR85934.1	ACD84472.1	QSR87990.1	TFE69530.1	MBC2607220.1	RXK54334.1	AOS43983.1	ACB74168.1	KXU34127.1	KXU36697.1	TSJ76628.1	ATC64023.1	AWI08253.1	WP_043585056.1	EDY18063.1	GAT33220.1	TLD70615.1	RBP37345.1	WP_009958346.1	GEP44410.1	TDU64599.1	SKA88589.1	ACD04349.1	OCA03659.1	MBB5352904.1	SHI74156.1	PQJ28247.1	WP_018970041.1
atpF	OG0000662	NGO38171.1	CAF0689649.1	VVM04764.1	VVM07983.1	WP_018290651.1	CAB4244662.1	WP_024808427.1	QSR84039.1	TFE70208.1	WP_009061822.1	QDQ43328.1	QSR85935.1	ACD84473.1	QSR87991.1	TFE69531.1	MBC2607221.1	RXK54335.1	AOS43984.1	ACB74167.1	KXU34128.1	KXU36698.1	TSJ76627.1	ATC64024.1	AWI08254.1	WP_043585054.1	EDY18062.1	GAT33221.1	TLD70430.1	RBP37346.1	WP_009958348.1	GEP44409.1	TDU64600.1	SKA88591.1	ACD04348.1	OCA03660.1	MBB5352905.1	SHI74205.1	PQJ28246.1	WP_018970040.1
atpdelta	OG0000663	NGO38170.1	CAF0689647.1	VVM04765.1	VVM07985.1	WP_018290652.1	CAB4244661.1	WP_024808428.1	QSR84040.1	TFE70207.1	WP_009061824.1	QDQ43329.1	QSR85936.1	ACD84474.1	QSR87992.1	TFE69532.1	MBC2607222.1	RXK54336.1	AOS43985.1	ACB74166.1	KXU34129.1	KXU36699.1	TSJ76626.1	ATC64025.1	AWI08255.1	WP_043585052.1	EDY18061.1	GAT33222.1	TLD70429.1	RBP37347.1	WP_009958349.1	GEP44408.1	TDU64601.1	SKA88596.1	ACD04347.1	OCA03661.1	MBB5352906.1	SHI74250.1	PQJ28245.1	WP_018970039.1
atpA	OG0000765	NGO38169.1	CAF0689645.1	VVM04766.1	VVM07987.1	WP_018290653.1	CAB4244660.1	WP_024808429.1	QSR84041.1	TFE70206.1	WP_009061829.1	QDQ43330.1	QSR85937.1	ACD84475.1	QSR87993.1	TFE69533.1	MBC2607223.1	RXK54337.1		ACB74165.1	KXU34130.1	KXU36700.1	TSJ76625.1	ATC64026.1	AWI08257.1	WP_043585051.1	EDY18060.1	GAT33223.1	TLD70428.1	RBP37348.1	WP_009958350.1	GEP44407.1	TDU64602.1	SKA88600.1	ACD04346.1	OCA03662.1	MBB5352907.1	SHI74298.1	PQJ28244.1	WP_018970038.1
atpG	OG0000766	NGO38168.1	CAF0689643.1	VVM05109.1	VVM07988.1	WP_018290654.1	CAB4244659.1	WP_024808430.1	QSR84042.1	TFE70205.1	WP_009061832.1	QDQ43331.1	QSR85938.1	ACD84476.1	QSR87994.1	TFE69534.1	MBC2607224.1	RXK54338.1	AOS43986.1	ACB74164.1	KXU34131.1	KXU36701.1	TSJ76624.1	ATC64027.1		WP_043585049.1	EDY18059.1	GAT33224.1	TLD70427.1	RBP37349.1	WP_009958351.1	GEP44406.1	TDU64603.1	SKA88603.1	ACD04345.1	OCA03663.1	MBB5352908.1	SHI74340.1	PQJ28243.1	WP_018970037.1
atpD	OG0000214	NGO38167.1	CAF0689641.1	VVM05111.1, VVM05932.1	VVM06193.1, VVM07989.1	WP_020494096.1, WP_040887943.1	CAB4243265.1, CAB4244658.1	WP_024808431.1, WP_051460375.1	QSR84043.1, QSR85375.1	TFE70103.1, TFE70204.1	WP_009058960.1, WP_009061833.1	QDQ42151.1, QDQ43332.1	QSR85939.1, QSR86627.1	ACD82894.1, ACD84477.1	QSR87995.1, QSR89121.1	TFE67483.1, TFE69535.1	MBC2607225.1	RXK54339.1	AOS43987.1	ACB74163.1	KXU34132.1	KXU36702.1	TSJ76623.1	ATC64028.1	AWI08258.1	WP_043585047.1	EDY18058.1	GAT33225.1	TLD70426.1	RBP37350.1	WP_009958352.1	GEP44405.1	TDU64604.1	SKA88612.1	ACD04344.1	OCA03664.1	MBB5352911.1	SHI74385.1	PQJ28242.1	WP_018970036.1
atpC	OG0000471	NGO38166.1	CAF0689639.1, CAF0689803.1	VVM05113.1	VVM07990.1	WP_018290656.1	CAB4244657.1	WP_024808432.1	QSR84044.1	TFE70203.1	WP_009061834.1	QDQ43333.1	QSR85940.1	ACD84478.1	QSR87996.1	TFE69536.1	MBC2607226.1	RXK54340.1	AOS43988.1	ACB74162.1	KXU34133.1	KXU36703.1	TSJ76622.1	ATC64029.1	AWI08259.1	WP_043585045.1	EDY18056.1	GAT33226.1	TLD70425.1	RBP37351.1	WP_009958353.1	GEP44404.1	TDU64605.1	SKA88616.1	ACD04343.1	OCA03665.1	MBB5352912.1	SHI74430.1	PQJ28241.1	WP_033367648.1
pstS	OG0001832		CAF0702622.1	VVM08499.1	VVM05106.1	WP_018290312.1	CAB4242662.1	WP_024808708.1	QSR84288.1	TFE68701.1	WP_009059460.1	QDQ43002.1	QSR86288.1	ACD82452.1	QSR88314.1	TFE70625.1												GAT33380.1			WP_029190251.1					OCA03542.1
pstC	OG0000063	NGO38683.1, NGO38684.1, NGO40368.1, NGO40369.1	CAF0702616.1, CAF0702619.1	VVM08497.1, VVM08498.1	VVM05107.1, VVM05108.1	WP_018290314.1, WP_020494007.1	CAB4242660.1, CAB4242661.1	WP_024808706.1, WP_024808707.1	QSR84287.1, QSR85853.1	TFE68699.1, TFE68700.1	WP_009059461.1, WP_009059462.1	QDQ43003.1, QDQ43004.1	QSR86286.1, QSR86287.1	ACD82450.1, ACD82451.1	QSR88312.1, QSR88313.1	TFE70624.1, TFE70736.1	MBC2604975.1, MBC2604976.1	RXK55553.1, RXK55554.1	AOS45227.1, AOS45228.1	ACB75828.1, ACB75829.1	KXU36825.1	KXU35029.1, KXU35055.1	TSJ78871.1, TSJ78872.1	ATC64645.1, ATC64646.1		WP_043589249.1, WP_043589250.1	EDY18132.1, EDY18133.1, EDY21239.1, EDY21240.1	GAT33381.1, GAT33382.1	TLD70569.1, TLD70570.1, TLD70698.1, TLD70699.1	RBP38632.1, RBP38633.1, RBP47235.1, RBP47236.1, RBP48031.1, RBP48032.1	WP_009959674.1, WP_009959898.1, WP_009959899.1, WP_009964274.1, WP_009964275.1	GEP42517.1, GEP42518.1	TDU72987.1, TDU72988.1	SKB03765.1, SKB03770.1	ACD05128.1, ACD05129.1	OCA03543.1, OCA03549.1	MBB5349855.1, MBB5349856.1	SHI88263.1, SHI88308.1	PQJ27910.1, PQJ30261.1	WP_018970866.1, WP_018970867.1
pstA	OG0000063
pstB	OG0000179	NGO38685.1, NGO40370.1, NGO40371.1	CAF0702613.1	VVM08496.1	VVM05110.1	WP_018290315.1	CAB4242659.1	WP_024808705.1	QSR84286.1	TFE68717.1	WP_009059463.1	QDQ43005.1	QSR87789.1	ACD82449.1	QSR89790.1	TFE70735.1	MBC2604977.1	RXK55555.1	AOS45229.1	ACB75830.1	KXU36824.1	KXU35054.1	TSJ78870.1	ATC64647.1		WP_043589282.1	EDY18134.1, EDY21238.1	GAT33383.1	TLD70568.1, TLD70683.1, TLD70697.1, TLD70920.1	RBP38634.1, RBP38635.1, RBP47237.1, RBP47238.1, RBP48030.1	WP_009964276.1, WP_044133462.1, WP_075089709.1	GEP42519.1, GEP42520.1	TDU71359.1, TDU72986.1	SKA80614.1, SKB03762.1	ACD05127.1, ACD05131.1	OCA03544.1	MBB5349857.1, MBB5349858.1	SHI88206.1	PQJ27911.1, PQJ29095.1	WP_156817268.1
can	OG0001718	NGO40431.1	CAF0691546.1	VVM07055.1	VVM07252.1	WP_018290803.1, WP_018290881.1, WP_081616280.1	CAB4242608.1	WP_024808582.1	QSR84182.1	TFE68364.1	WP_009061375.1	QDQ41994.1	QSR85902.1	ACD84423.1	QSR88576.1	TFE67768.1				ACB75314.1								GAT35490.1
can2	OG0001095		CAF0697249.1	VVM06829.1					QSR85344.1								MBC2604621.1, MBC2606955.1	RXK56853.1	AOS46438.1	ACB75856.1, ACB76582.1			TSJ75023.1	ATC63863.1		WP_043587945.1	EDY18318.1, EDY18897.1	GAT34521.1	TLD69845.1	RBP35513.1, RBP43721.1	WP_009961457.1, WP_009961664.1	GEP46458.1	TDU64346.1, TDU70875.1	SKA86736.1, SKA89027.1			MBB5352110.1	SHJ27095.1	PQJ30197.1, PQJ30418.1	WP_169334317.1

## Sheet: Suppl. Table 4
Supplementary Table 4. Fast-ANI matrix values
	Methylacidiphilum infernorum V4 ASM1966v1	Methylacidiphilum fumariolicum SolV ASM29741v1	Verrucomicrobium sp. 3C	Methylacidiphilum kamchatkense Kam1 ASM81724v1	Methylacidiphilum fumariolicum ASM442115v1	Methylacidiphilum fumariolicum ASM442116v1	Methylacidiphilum fumariolicum ASM442117v1	Methylacidiphilum sp. Yel	Methylacidiphilum fumariolicum ASM442119v1	Methylacidiphilum sp. Phi	Methylacidiphilum kamchatkense Kam1 ASM747552v1	Methylacidiphilum sp. IT6	Methylacidiphilum sp. IT5	Methylacidimicrobium sp. B4	Methylacidimicrobium tartarophylax	Methylacidimicrobium cyclopophantes	Methylacidimicrobium sp. AP8	Candidatus Methylacidithermus pantelleriae	Verrucomicrobia bacterium LP2A	Methylacidiphilum fumariolicum SolV MfumSolVChr1
Methylacidiphilum infernorum V4 ASM1966v1
Methylacidiphilum fumariolicum SolV ASM29741v1	NA
Verrucomicrobium sp. 3C	NA	NA
Methylacidiphilum kamchatkense Kam1 ASM81724v1	76.4256	92.5899	NA
Methylacidiphilum fumariolicum ASM442115v1	NA	99.9712	NA	92.5475
Methylacidiphilum fumariolicum ASM442116v1	NA	99.9607	NA	92.6005	99.982
Methylacidiphilum fumariolicum ASM442117v1	NA	99.9609	NA	92.5341	99.9858	99.9739
Methylacidiphilum sp. Yel	NA	93.5165	NA	92.9136	93.54	93.5115	93.5646
Methylacidiphilum fumariolicum ASM442119v1	NA	99.9562	NA	92.5579	99.9892	99.9746	99.9755	93.5156
Methylacidiphilum sp. Phi	78.5216	76.9571	NA	77.0257	77.0408	76.9812	77.1072	77.0946	77.0778
Methylacidiphilum kamchatkense Kam1 ASM747552v1	76.4705	92.6349	NA	99.9579	92.6068	92.5577	92.5634	92.9076	92.546	76.9859
Methylacidiphilum sp. IT6	78.48	77.0176	NA	76.9802	77.0679	77.0358	77.1559	76.9996	77.1261	98.561	76.9294
Methylacidiphilum sp. IT5	96.1307	NA	NA	NA	NA	NA	NA	NA	NA	78.3605	76.6889	78.4292
Methylacidimicrobium sp. B4	NA	NA	79.903	NA	NA	NA	NA	NA	NA	NA	NA	NA	NA
Methylacidimicrobium tartarophylax	NA	NA	87.7557	NA	NA	NA	NA	NA	NA	NA	NA	NA	NA	79.9641
Methylacidimicrobium cyclopophantes	NA	NA	78.5962	NA	NA	NA	NA	NA	NA	NA	NA	NA	NA	79.0382	78.9701
Methylacidimicrobium sp. AP8	NA	NA	80.3386	NA	NA	NA	NA	NA	NA	NA	NA	NA	NA	80.9717	79.4397	77.9102
Candidatus Methylacidithermus pantelleriae	NA	NA	NA	NA	NA	NA	NA	NA	NA	NA	NA	NA	NA	NA	NA	NA	NA
Verrucomicrobia bacterium LP2A	NA	NA	79.8379	NA	NA	NA	NA	NA	NA	NA	NA	NA	NA	92.0757	80.1967	78.77	81.1245	NA
Methylacidiphilum fumariolicum SolV MfumSolVChr1	NA	99.9209	NA	92.412	99.9182	99.9213	99.9273	93.4469	99.9209	76.9983	92.5319	77.0414	NA	NA	NA	NA	NA	NA	NA

## Sheet: Suppl. Table 5
Supplementary Table 5. dDDH matrix values
	Methylacidiphilum infernorum V4 ASM1966v1	Methylacidiphilum fumariolicum SolV ASM29741v1	Verrucomicrobium sp. 3C	Methylacidiphilum kamchatkense Kam1 ASM81724v1	Methylacidiphilum fumariolicum ASM442115v1	Methylacidiphilum fumariolicum ASM442116v1	Methylacidiphilum fumariolicum ASM442117v1	Methylacidiphilum sp. Yel	Methylacidiphilum fumariolicum ASM442119v1	Methylacidiphilum sp. Phi	Methylacidiphilum kamchatkense Kam1 ASM747552v1	Methylacidiphilum sp. IT6	Methylacidiphilum sp. IT5	Methylacidimicrobium sp. B4	Methylacidimicrobium tartarophylax	Methylacidimicrobium cyclopophantes	Methylacidimicrobium sp. AP8	Candidatus Methylacidithermus pantelleriae	Verrucomicrobia bacterium LP2A	Methylacidiphilum fumariolicum SolV MfumSolVChr1
Methylacidiphilum infernorum V4 ASM1966v1	-
Methylacidiphilum fumariolicum SolV ASM29741v1	17.1
Verrucomicrobium sp. 3C	25.7	27.9
Methylacidiphilum kamchatkense Kam1 ASM81724v1	17.1	49.9	30.6
Methylacidiphilum fumariolicum ASM442115v1	17.1	99.4	27.6	49.9
Methylacidiphilum fumariolicum ASM442116v1	17.1	99.6	27.3	49.9	99.7
Methylacidiphilum fumariolicum ASM442117v1	17.1	99.3	27.6	49.9	99.8	99.6
Methylacidiphilum sp. Yel	17.1	55.3	30.1	50.4	55.3	55.4	55.4
Methylacidiphilum fumariolicum ASM442119v1	17.1	99.4	27.6	49.9	99.9	99.6	99.8	55.3
Methylacidiphilum sp. Phi	20.1	17.5	29.5	17.5	17.6	17.5	17.5	17.4	17.6
Methylacidiphilum kamchatkense Kam1 ASM747552v1	17.1	49.9	30.6	99.8	49.9	49.9	49.9	50.4	49.9	17.4
Methylacidiphilum sp. IT6	20.1	17.4	29.5	17.6	17.4	17.4	17.4	17.4	17.4	86.4	17.6
Methylacidiphilum sp. IT5	68.4	16.8	25.7	16.8	16.8	16.8	16.8	16.7	16.8	19.8	16.8	19.8
Methylacidimicrobium sp. B4	24.4	28.2	21.8	28.8	28.2	27.8	28.2	29.1	28.2	30.1	28.8	30.2	24.8
Methylacidimicrobium tartarophylax	24	30.3	33.9	30.9	30.3	29.7	30.3	30.3	30.3	29.7	30.9	29.8	28.2	21.4
Methylacidimicrobium cyclopophantes	26.5	31.5	21	31.1	32.1	30.9	31.6	30.8	31.8	28.7	31.1	28	26.6	20.7	21.2
Methylacidimicrobium sp. AP8	22.1	29.6	23.8	30.5	29.6	29.1	29.6	29.9	29.6	29.7	30.5	29.7	28.1	22.7	21.1	19.3
Candidatus Methylacidithermus pantelleriae	24.8	25.4	26.9	25.3	25.4	25	25.4	25.7	25.4	25.1	25.3	24.8	25.3	29.8	29.1	29.8	28.1
Verrucomicrobia bacterium LP2A	25.1	28	22.1	28.4	28	27.6	28	30.7	28	27.6	28.4	26.9	30.4	45.8	21.6	20.7	22.8	29.7
Methylacidiphilum fumariolicum SolV MfumSolVChr1	17.1	99.3	26.8	49.8	99.2	99.1	98.8	55	99	17.5	49.8	17.4	16.8	28.2	30.3	35.7	29.6	25.4	28	-

## Sheet: Suppl. Table 6
Supplementary Table 6. AAI matrix values
	Methylacidiphilum infernorum V4	Methylacidiphilum fumariolicum SolV	Verrucomicrobium sp. 3C	Methylacidiphilum kamchatkense Kam1	Methylacidiphilum fumariolicum	Methylacidiphilum fumariolicum	Methylacidiphilum fumariolicum	Methylacidiphilum sp. Yel	Methylacidiphilum fumariolicum	Methylacidiphilum sp. Phi	Methylacidiphilum kamchatkense Kam1	Methylacidiphilum sp. IT6	Methylacidiphilum sp. IT5	Methylacidimicrobium sp. B4	Methylacidimicrobium tartarophylax	Methylacidimicrobium cyclopophantes	Methylacidimicrobium sp. AP8 (verrucomicrobia)	Candidatus Methylacidithermus pantelleriae	Verrucomicrobia bacterium LP2A	Methylacidiphilum fumariolicum SolV
Methylacidiphilum infernorum V4	0	0.24903	0.9	0.252133	0.249466	0.250215	0.249977	0.253541	0.2474	0.223417	0.25175	0.222226	0.0404793	0.176462	0.9	0.9	0.9	0.9	0.183602	0.248165
Methylacidiphilum fumariolicum SolV	0.24903	0	0.9	0.0767453	0.000226614	0.000252112	0.000380663	0.063606	0.000192959	0.244472	0.0766057	0.243661	0.248063	0.9	0.9	0.9	0.9	0.9	0.9	0.000131148
Verrucomicrobium sp. 3C	0.9	0.9	0	0.9	0.9	0.9	0.9	0.9	0.9	0.9	0.9	0.9	0.9	0.203053	0.130316	0.213322	0.194409	0.211343	0.199676	0.9
Methylacidiphilum kamchatkense Kam1	0.252133	0.0767453	0.9	0	0.0768341	0.0765813	0.0770651	0.07472	0.0765113	0.245122	0.000399732	0.246944	0.253554	0.9	0.9	0.9	0.9	0.9	0.9	0.0765931
Methylacidiphilum fumariolicum	0.249466	0.000226614	0.9	0.0768341	0	0.000157673	0.000152678	0.0631597	0.000113712	0.244513	0.0768791	0.244994	0.248917	0.9	0.9	0.9	0.9	0.9	0.9	0.000215068
Methylacidiphilum fumariolicum	0.250215	0.000252112	0.9	0.0765813	0.000157673	0	0.000160135	0.0634949	0.000221857	0.24541	0.0765941	0.242374	0.248773	0.9	0.9	0.9	0.9	0.9	0.9	0.000287671
Methylacidiphilum fumariolicum	0.249977	0.000380663	0.9	0.0770651	0.000152678	0.000160135	0	0.0632356	0.000198955	0.243723	0.0771605	0.244908	0.250446	0.9	0.9	0.9	0.9	0.9	0.9	0.000370929
Methylacidiphilum sp. Yel	0.253541	0.063606	0.9	0.07472	0.0631597	0.0634949	0.0632356	0	0.063256	0.247145	0.0751699	0.2467	0.255004	0.9	0.9	0.9	0.9	0.9	0.9	0.0634443
Methylacidiphilum fumariolicum	0.2474	0.000192959	0.9	0.0765113	0.000113712	0.000221857	0.000198955	0.063256	0	0.24569	0.0769256	0.242816	0.251044	0.9	0.9	0.9	0.9	0.9	0.9	0.000271692
Methylacidiphilum sp. Phi	0.223417	0.244472	0.9	0.245122	0.244513	0.24541	0.243723	0.247145	0.24569	0	0.245263	0.0139208	0.225645	0.9	0.9	0.9	0.9	0.9	0.9	0.243852
Methylacidiphilum kamchatkense Kam1	0.25175	0.0766057	0.9	0.000399732	0.0768791	0.0765941	0.0771605	0.0751699	0.0769256	0.245263	0	0.246413	0.251759	0.9	0.9	0.9	0.9	0.9	0.9	0.0770719
Methylacidiphilum sp. IT6	0.222226	0.243661	0.9	0.246944	0.244994	0.242374	0.244908	0.2467	0.242816	0.0139208	0.246413	0	0.225487	0.9	0.9	0.9	0.9	0.9	0.9	0.243391
Methylacidiphilum sp. IT5	0.0404793	0.248063	0.9	0.253554	0.248917	0.248773	0.250446	0.255004	0.251044	0.225645	0.251759	0.225487	0	0.9	0.9	0.9	0.9	0.9	0.9	0.249692
Methylacidimicrobium sp. B4	0.176462	0.9	0.203053	0.9	0.9	0.9	0.9	0.9	0.9	0.9	0.9	0.9	0.9	0	0.203551	0.212639	0.194995	0.9	0.090392	0.9
Methylacidimicrobium tartarophylax	0.9	0.9	0.130316	0.9	0.9	0.9	0.9	0.9	0.9	0.9	0.9	0.9	0.9	0.203551	0	0.211547	0.207249	0.9	0.203276	0.9
Methylacidimicrobium cyclopophantes	0.9	0.9	0.213322	0.9	0.9	0.9	0.9	0.9	0.9	0.9	0.9	0.9	0.9	0.212639	0.211547	0	0.22348	0.9	0.214158	0.9
Methylacidimicrobium sp. AP8 (verrucomicrobia)	0.9	0.9	0.194409	0.9	0.9	0.9	0.9	0.9	0.9	0.9	0.9	0.9	0.9	0.194995	0.207249	0.22348	0	0.196146	0.194479	0.9
Candidatus Methylacidithermus pantelleriae	0.9	0.9	0.211343	0.9	0.9	0.9	0.9	0.9	0.9	0.9	0.9	0.9	0.9	0.9	0.9	0.9	0.196146	0	0.9	0.9
Verrucomicrobia bacterium LP2A	0.183602	0.9	0.199676	0.9	0.9	0.9	0.9	0.9	0.9	0.9	0.9	0.9	0.9	0.090392	0.203276	0.214158	0.194479	0.9	0	0.9
Methylacidiphilum fumariolicum SolV	0.248165	0.000131148	0.9	0.0765931	0.000215068	0.000287671	0.000370929	0.0634443	0.000271692	0.243852	0.0770719	0.243391	0.249692	0.9	0.9	0.9	0.9	0.9	0.9	0

## Sheet: Suppl. Table 7
Supplementary Table7. HGTector results in Acidophiles from Verrucomicrobia
Protein ID	score	TaxID	Donor taxa name
CAF0692915.1	0.504493	1117	Cyanobacteria
CAF0700384.1	0.59804	1123389	Thermus islandicus DSM 21543
CAF0700626.1	0.51709	119060	Burkholderiaceae
CAF0688827.1	0.5782	1224	Proteobacteria
CAF0688836.1	0.613176	1224	Proteobacteria
CAF0688839.1	0.409207	1224	Proteobacteria
CAF0689202.1	0.572598	1224	Proteobacteria
CAF0689580.1	0.557737	1224	Proteobacteria
CAF0689747.1	0.590527	1224	Proteobacteria
CAF0689763.1	0.607206	1224	Proteobacteria
CAF0689789.1	0.554131	1224	Proteobacteria
CAF0689947.1	0.59504	1224	Proteobacteria
CAF0691895.1	0.583502	1224	Proteobacteria
CAF0691995.1	0.515545	1224	Proteobacteria
CAF0692493.1	0.574518	1224	Proteobacteria
CAF0692945.1	0.533155	1224	Proteobacteria
CAF0693612.1	0.61309	1224	Proteobacteria
CAF0693615.1	0.55589	1224	Proteobacteria
CAF0694726.1	0.585666	1224	Proteobacteria
CAF0695391.1	0.543113	1224	Proteobacteria
CAF0696091.1	0.608007	1224	Proteobacteria
CAF0696191.1	0.50391	1224	Proteobacteria
CAF0696319.1	0.535551	1224	Proteobacteria
CAF0696368.1	0.594926	1224	Proteobacteria
CAF0696386.1	0.560405	1224	Proteobacteria
CAF0696947.1	0.602606	1224	Proteobacteria
CAF0697040.1	0.585713	1224	Proteobacteria
CAF0697446.1	0.501151	1224	Proteobacteria
CAF0697509.1	0.603187	1224	Proteobacteria
CAF0697823.1	0.611556	1224	Proteobacteria
CAF0699905.1	0.575604	1224	Proteobacteria
CAF0699911.1	0.28315	1224	Proteobacteria
CAF0699917.1	0.310472	1224	Proteobacteria
CAF0700157.1	0.547637	1224	Proteobacteria
CAF0700700.1	0.490726	1224	Proteobacteria
CAF0702239.1	0.526482	1224	Proteobacteria
CAF0702266.1	0.611825	1224	Proteobacteria
CAF0702640.1	0.569006	1224	Proteobacteria
CAF0702649.1	0.610209	1224	Proteobacteria
CAF0703672.1	0.540961	1224	Proteobacteria
CAF0703717.1	0.612679	1224	Proteobacteria
CAF0703759.1	0.605888	1224	Proteobacteria
CAF0703931.1	0.607388	1224	Proteobacteria
CAF0704502.1	0.547819	1224	Proteobacteria
CAF0705066.1	0.425907	1224	Proteobacteria
CAF0705283.1	0.565716	1224	Proteobacteria
CAF0694390.1	0.535652	1230846	Acidobacteria bacterium AB60
CAF0689725.1	0.567594	1234	Nitrospira
CAF0694027.1	0.541001	1234	Nitrospira
CAF0704424.1	0.613145	1234	Nitrospira
CAF0698782.1	0.516771	1236	Gammaproteobacteria
CAF0701800.1	0.543538	1239	Firmicutes
CAF0702370.1	0.540251	1239	Firmicutes
CAF0702242.1	0.506466	1283300	Methylohalobius crimeensis 10Ki
CAF0688881.1	0.567772	131567	cellular organisms
CAF0688932.1	0.527085	131567	cellular organisms
CAF0688988.1	0.553954	131567	cellular organisms
CAF0689247.1	0.546144	131567	cellular organisms
CAF0689359.1	0.539138	131567	cellular organisms
CAF0689366.1	0.59699	131567	cellular organisms
CAF0689441.1	0.44259	131567	cellular organisms
CAF0689665.1	0.507214	131567	cellular organisms
CAF0689707.1	0.604017	131567	cellular organisms
CAF0689723.1	0.607661	131567	cellular organisms
CAF0689759.1	0.50152	131567	cellular organisms
CAF0689951.1	0.517694	131567	cellular organisms
CAF0691904.1	0.578145	131567	cellular organisms
CAF0692001.1	0.507439	131567	cellular organisms
CAF0693627.1	0.528275	131567	cellular organisms
CAF0694015.1	0.552784	131567	cellular organisms
CAF0694622.1	0.544766	131567	cellular organisms
CAF0694649.1	0.522804	131567	cellular organisms
CAF0694940.1	0.550372	131567	cellular organisms
CAF0696346.1	0.460516	131567	cellular organisms
CAF0697515.1	0.585127	131567	cellular organisms
CAF0697772.1	0.505907	131567	cellular organisms
CAF0698945.1	0.544309	131567	cellular organisms
CAF0699090.1	0.401927	131567	cellular organisms
CAF0699135.1	0.605758	131567	cellular organisms
CAF0700841.1	0.559343	131567	cellular organisms
CAF0701236.1	0.588483	131567	cellular organisms
CAF0702505.1	0.612872	131567	cellular organisms
CAF0702538.1	0.406558	131567	cellular organisms
CAF0702613.1	0.501749	131567	cellular organisms
CAF0702680.1	0.517998	131567	cellular organisms
CAF0703599.1	0.506662	131567	cellular organisms
CAF0704470.1	0.585978	131567	cellular organisms
CAF0705295.1	0.564264	131567	cellular organisms
CAF0688821.1	0.582176	1385	Bacillales
CAF0702030.1	0.602271	1760	Actinobacteria
CAF0705084.1	0.58206	1760988	Methylomagnum ishizawai
CAF0688872.1	0.466535	1783272	Terrabacteria group
CAF0689353.1	0.592721	1783272	Terrabacteria group
CAF0693609.1	0.535688	1783272	Terrabacteria group
CAF0694009.1	0.609852	1783272	Terrabacteria group
CAF0696238.1	0.566651	1783272	Terrabacteria group
CAF0696938.1	0.569913	1783272	Terrabacteria group
CAF0700769.1	0.524314	1783272	Terrabacteria group
CAF0704436.1	0.48964	1783272	Terrabacteria group
CAF0702454.1	0.587228	186801	Clostridia
CAF0701726.1	0.610669	188786	Thermaceae
CAF0692894.1	0.583121	188787	Deinococci
CAF0704428.1	0.545071	189779	Nitrospiraceae
CAF0688854.1	0.579233	2	Bacteria
CAF0688884.1	0.38832	2	Bacteria
CAF0688899.1	0.507116	2	Bacteria
CAF0688902.1	0.58908	2	Bacteria
CAF0688950.1	0.545963	2	Bacteria
CAF0689000.1	0.612989	2	Bacteria
CAF0689003.1	0.611748	2	Bacteria
CAF0689105.1	0.61102	2	Bacteria
CAF0689108.1	0.583305	2	Bacteria
CAF0689141.1	0.58189	2	Bacteria
CAF0689150.1	0.507796	2	Bacteria
CAF0689153.1	0.558415	2	Bacteria
CAF0689187.1	0.611937	2	Bacteria
CAF0689223.1	0.60967	2	Bacteria
CAF0689241.1	0.586805	2	Bacteria
CAF0689253.1	0.597778	2	Bacteria
CAF0689286.1	0.60241	2	Bacteria
CAF0689319.1	0.51589	2	Bacteria
CAF0689322.1	0.598733	2	Bacteria
CAF0689331.1	0.507074	2	Bacteria
CAF0689334.1	0.50643	2	Bacteria
CAF0689341.1	0.473393	2	Bacteria
CAF0689344.1	0.515976	2	Bacteria
CAF0689369.1	0.570461	2	Bacteria
CAF0689372.1	0.558154	2	Bacteria
CAF0689375.1	0.535337	2	Bacteria
CAF0689402.1	0.553095	2	Bacteria
CAF0689411.1	0.479656	2	Bacteria
CAF0689417.1	0.609903	2	Bacteria
CAF0689429.1	0.545865	2	Bacteria
CAF0689447.1	0.595246	2	Bacteria
CAF0689477.1	0.384072	2	Bacteria
CAF0689486.1	0.520517	2	Bacteria
CAF0689490.1	0.508779	2	Bacteria
CAF0689523.1	0.536748	2	Bacteria
CAF0689538.1	0.513892	2	Bacteria
CAF0689541.1	0.607324	2	Bacteria
CAF0689571.1	0.603794	2	Bacteria
CAF0689574.1	0.565631	2	Bacteria
CAF0689595.1	0.553509	2	Bacteria
CAF0689598.1	0.581452	2	Bacteria
CAF0689601.1	0.520619	2	Bacteria
CAF0689633.1	0.571268	2	Bacteria
CAF0689637.1	0.606009	2	Bacteria
CAF0689641.1	0.370338	2	Bacteria
CAF0689643.1	0.608564	2	Bacteria
CAF0689659.1	0.587917	2	Bacteria
CAF0689673.1	0.586789	2	Bacteria
CAF0689675.1	0.605462	2	Bacteria
CAF0689685.1	0.612409	2	Bacteria
CAF0689693.1	0.500905	2	Bacteria
CAF0689735.1	0.444556	2	Bacteria
CAF0689737.1	0.609247	2	Bacteria
CAF0689739.1	0.500106	2	Bacteria
CAF0689755.1	0.570929	2	Bacteria
CAF0689783.1	0.55781	2	Bacteria
CAF0689791.1	0.577429	2	Bacteria
CAF0689827.1	0.542006	2	Bacteria
CAF0689831.1	0.576781	2	Bacteria
CAF0689837.1	0.586963	2	Bacteria
CAF0689841.1	0.520871	2	Bacteria
CAF0689911.1	0.510582	2	Bacteria
CAF0689919.1	0.559994	2	Bacteria
CAF0689925.1	0.50201	2	Bacteria
CAF0689927.1	0.560357	2	Bacteria
CAF0689941.1	0.567814	2	Bacteria
CAF0689945.1	0.575247	2	Bacteria
CAF0689953.1	0.601124	2	Bacteria
CAF0689961.1	0.602469	2	Bacteria
CAF0691330.1	0.512812	2	Bacteria
CAF0691354.1	0.549982	2	Bacteria
CAF0691402.1	0.378857	2	Bacteria
CAF0691405.1	0.45708	2	Bacteria
CAF0691408.1	0.296062	2	Bacteria
CAF0691420.1	0.604925	2	Bacteria
CAF0691426.1	0.586273	2	Bacteria
CAF0691474.1	0.604761	2	Bacteria
CAF0691477.1	0.61018	2	Bacteria
CAF0691495.1	0.531806	2	Bacteria
CAF0691546.1	0.414554	2	Bacteria
CAF0691861.1	0.58115	2	Bacteria
CAF0691864.1	0.433046	2	Bacteria
CAF0691889.1	0.560593	2	Bacteria
CAF0691892.1	0.613103	2	Bacteria
CAF0691898.1	0.583999	2	Bacteria
CAF0691901.1	0.498268	2	Bacteria
CAF0691907.1	0.57104	2	Bacteria
CAF0691928.1	0.612477	2	Bacteria
CAF0691949.1	0.554371	2	Bacteria
CAF0691952.1	0.600216	2	Bacteria
CAF0691974.1	0.608289	2	Bacteria
CAF0691977.1	0.603395	2	Bacteria
CAF0692010.1	0.541034	2	Bacteria
CAF0692013.1	0.612964	2	Bacteria
CAF0692046.1	0.554628	2	Bacteria
CAF0692049.1	0.560354	2	Bacteria
CAF0692058.1	0.564836	2	Bacteria
CAF0692396.1	0.566295	2	Bacteria
CAF0692442.1	0.525016	2	Bacteria
CAF0692445.1	0.502055	2	Bacteria
CAF0692499.1	0.481946	2	Bacteria
CAF0692512.1	0.567654	2	Bacteria
CAF0692524.1	0.503599	2	Bacteria
CAF0692545.1	0.549508	2	Bacteria
CAF0692918.1	0.544696	2	Bacteria
CAF0692963.1	0.603496	2	Bacteria
CAF0692969.1	0.592631	2	Bacteria
CAF0693023.1	0.573178	2	Bacteria
CAF0693041.1	0.579534	2	Bacteria
CAF0693048.1	0.570497	2	Bacteria
CAF0693069.1	0.594662	2	Bacteria
CAF0693072.1	0.54928	2	Bacteria
CAF0693501.1	0.561658	2	Bacteria
CAF0693525.1	0.521933	2	Bacteria
CAF0693570.1	0.583989	2	Bacteria
CAF0693573.1	0.566305	2	Bacteria
CAF0693922.1	0.524667	2	Bacteria
CAF0693985.1	0.570916	2	Bacteria
CAF0693988.1	0.568053	2	Bacteria
CAF0694003.1	0.53454	2	Bacteria
CAF0694012.1	0.542918	2	Bacteria
CAF0694018.1	0.608508	2	Bacteria
CAF0694303.1	0.576193	2	Bacteria
CAF0694425.1	0.576195	2	Bacteria
CAF0694604.1	0.601198	2	Bacteria
CAF0694682.1	0.598322	2	Bacteria
CAF0694729.1	0.607048	2	Bacteria
CAF0694943.1	0.612219	2	Bacteria
CAF0694955.1	0.595633	2	Bacteria
CAF0694961.1	0.612083	2	Bacteria
CAF0694976.1	0.550739	2	Bacteria
CAF0694982.1	0.517631	2	Bacteria
CAF0694988.1	0.539249	2	Bacteria
CAF0694991.1	0.57298	2	Bacteria
CAF0694997.1	0.583372	2	Bacteria
CAF0695006.1	0.512255	2	Bacteria
CAF0695009.1	0.598496	2	Bacteria
CAF0695012.1	0.507015	2	Bacteria
CAF0695015.1	0.573559	2	Bacteria
CAF0695018.1	0.536137	2	Bacteria
CAF0695024.1	0.346269	2	Bacteria
CAF0695027.1	0.604128	2	Bacteria
CAF0695036.1	0.596316	2	Bacteria
CAF0695345.1	0.411836	2	Bacteria
CAF0695376.1	0.397947	2	Bacteria
CAF0695412.1	0.537762	2	Bacteria
CAF0695427.1	0.534644	2	Bacteria
CAF0695430.1	0.602541	2	Bacteria
CAF0695439.1	0.515889	2	Bacteria
CAF0695454.1	0.588161	2	Bacteria
CAF0695466.1	0.581451	2	Bacteria
CAF0695478.1	0.598947	2	Bacteria
CAF0695873.1	0.56524	2	Bacteria
CAF0695882.1	0.596602	2	Bacteria
CAF0695906.1	0.579703	2	Bacteria
CAF0695921.1	0.582129	2	Bacteria
CAF0695927.1	0.511685	2	Bacteria
CAF0695951.1	0.613162	2	Bacteria
CAF0695966.1	0.590519	2	Bacteria
CAF0695978.1	0.601306	2	Bacteria
CAF0696002.1	0.525767	2	Bacteria
CAF0696023.1	0.571016	2	Bacteria
CAF0696044.1	0.612378	2	Bacteria
CAF0696050.1	0.563988	2	Bacteria
CAF0696059.1	0.599602	2	Bacteria
CAF0696065.1	0.540544	2	Bacteria
CAF0696068.1	0.551416	2	Bacteria
CAF0696094.1	0.603895	2	Bacteria
CAF0696137.1	0.610666	2	Bacteria
CAF0696194.1	0.424676	2	Bacteria
CAF0696233.1	0.570945	2	Bacteria
CAF0696271.1	0.502862	2	Bacteria
CAF0696304.1	0.564355	2	Bacteria
CAF0696325.1	0.591649	2	Bacteria
CAF0696343.1	0.561463	2	Bacteria
CAF0696377.1	0.581932	2	Bacteria
CAF0696395.1	0.558327	2	Bacteria
CAF0696401.1	0.52772	2	Bacteria
CAF0696992.1	0.542402	2	Bacteria
CAF0697010.1	0.556523	2	Bacteria
CAF0697022.1	0.611996	2	Bacteria
CAF0697028.1	0.584846	2	Bacteria
CAF0697207.1	0.610339	2	Bacteria
CAF0697298.1	0.518958	2	Bacteria
CAF0697545.1	0.556652	2	Bacteria
CAF0697551.1	0.600148	2	Bacteria
CAF0697557.1	0.541311	2	Bacteria
CAF0697563.1	0.556044	2	Bacteria
CAF0697575.1	0.501963	2	Bacteria
CAF0697578.1	0.57945	2	Bacteria
CAF0697751.1	0.60803	2	Bacteria
CAF0697832.1	0.612643	2	Bacteria
CAF0697844.1	0.597519	2	Bacteria
CAF0698020.1	0.587394	2	Bacteria
CAF0698026.1	0.576274	2	Bacteria
CAF0698053.1	0.505905	2	Bacteria
CAF0698339.1	0.522717	2	Bacteria
CAF0698525.1	0.517351	2	Bacteria
CAF0698586.1	0.510276	2	Bacteria
CAF0698632.1	0.357075	2	Bacteria
CAF0698653.1	0.573991	2	Bacteria
CAF0698740.1	0.575687	2	Bacteria
CAF0698752.1	0.571234	2	Bacteria
CAF0698764.1	0.583828	2	Bacteria
CAF0698767.1	0.547289	2	Bacteria
CAF0698773.1	0.505971	2	Bacteria
CAF0698776.1	0.599826	2	Bacteria
CAF0698791.1	0.597723	2	Bacteria
CAF0698797.1	0.54725	2	Bacteria
CAF0698801.1	0.567382	2	Bacteria
CAF0698804.1	0.497478	2	Bacteria
CAF0698813.1	0.543435	2	Bacteria
CAF0698817.1	0.565482	2	Bacteria
CAF0698823.1	0.413552	2	Bacteria
CAF0698829.1	0.480104	2	Bacteria
CAF0698835.1	0.586981	2	Bacteria
CAF0698838.1	0.592639	2	Bacteria
CAF0698850.1	0.54107	2	Bacteria
CAF0698862.1	0.56714	2	Bacteria
CAF0698868.1	0.603594	2	Bacteria
CAF0698871.1	0.528538	2	Bacteria
CAF0698877.1	0.57546	2	Bacteria
CAF0698880.1	0.488994	2	Bacteria
CAF0698883.1	0.53685	2	Bacteria
CAF0698891.1	0.53366	2	Bacteria
CAF0698897.1	0.508444	2	Bacteria
CAF0698927.1	0.370591	2	Bacteria
CAF0698939.1	0.507794	2	Bacteria
CAF0698948.1	0.605551	2	Bacteria
CAF0698951.1	0.604779	2	Bacteria
CAF0698960.1	0.611676	2	Bacteria
CAF0698972.1	0.510696	2	Bacteria
CAF0699012.1	0.353655	2	Bacteria
CAF0699021.1	0.543124	2	Bacteria
CAF0699030.1	0.566287	2	Bacteria
CAF0699048.1	0.581586	2	Bacteria
CAF0699117.1	0.460148	2	Bacteria
CAF0699120.1	0.541994	2	Bacteria
CAF0699123.1	0.611764	2	Bacteria
CAF0699129.1	0.51481	2	Bacteria
CAF0699163.1	0.611317	2	Bacteria
CAF0699166.1	0.613178	2	Bacteria
CAF0699175.1	0.542262	2	Bacteria
CAF0699264.1	0.487895	2	Bacteria
CAF0699268.1	0.579739	2	Bacteria
CAF0699920.1	0.505656	2	Bacteria
CAF0699926.1	0.607132	2	Bacteria
CAF0699929.1	0.606874	2	Bacteria
CAF0700039.1	0.612283	2	Bacteria
CAF0700117.1	0.448349	2	Bacteria
CAF0700154.1	0.612432	2	Bacteria
CAF0700160.1	0.598345	2	Bacteria
CAF0700614.1	0.58396	2	Bacteria
CAF0700623.1	0.480933	2	Bacteria
CAF0700706.1	0.504995	2	Bacteria
CAF0700709.1	0.57142	2	Bacteria
CAF0700760.1	0.58648	2	Bacteria
CAF0700766.1	0.612987	2	Bacteria
CAF0700772.1	0.544866	2	Bacteria
CAF0700793.1	0.594919	2	Bacteria
CAF0700802.1	0.580911	2	Bacteria
CAF0700820.1	0.385025	2	Bacteria
CAF0700823.1	0.522044	2	Bacteria
CAF0700835.1	0.611353	2	Bacteria
CAF0700856.1	0.60379	2	Bacteria
CAF0700886.1	0.552179	2	Bacteria
CAF0700889.1	0.564151	2	Bacteria
CAF0700918.1	0.607282	2	Bacteria
CAF0700954.1	0.491054	2	Bacteria
CAF0700963.1	0.60548	2	Bacteria
CAF0701035.1	0.521535	2	Bacteria
CAF0701047.1	0.608756	2	Bacteria
CAF0701077.1	0.600295	2	Bacteria
CAF0701110.1	0.540192	2	Bacteria
CAF0701164.1	0.562802	2	Bacteria
CAF0701167.1	0.542834	2	Bacteria
CAF0701197.1	0.55651	2	Bacteria
CAF0701209.1	0.5685	2	Bacteria
CAF0701758.1	0.595577	2	Bacteria
CAF0701788.1	0.594187	2	Bacteria
CAF0701797.1	0.502943	2	Bacteria
CAF0701812.1	0.589235	2	Bacteria
CAF0701818.1	0.521667	2	Bacteria
CAF0701926.1	0.573496	2	Bacteria
CAF0701938.1	0.554888	2	Bacteria
CAF0701979.1	0.58857	2	Bacteria
CAF0702078.1	0.575555	2	Bacteria
CAF0702081.1	0.508482	2	Bacteria
CAF0702163.1	0.506268	2	Bacteria
CAF0702319.1	0.603828	2	Bacteria
CAF0702343.1	0.586956	2	Bacteria
CAF0702358.1	0.537687	2	Bacteria
CAF0702397.1	0.42038	2	Bacteria
CAF0702415.1	0.549211	2	Bacteria
CAF0702475.1	0.541296	2	Bacteria
CAF0702481.1	0.590687	2	Bacteria
CAF0702484.1	0.595897	2	Bacteria
CAF0702496.1	0.467613	2	Bacteria
CAF0702499.1	0.546543	2	Bacteria
CAF0702523.1	0.50908	2	Bacteria
CAF0702565.1	0.604693	2	Bacteria
CAF0702616.1	0.579343	2	Bacteria
CAF0702619.1	0.545083	2	Bacteria
CAF0702622.1	0.545205	2	Bacteria
CAF0702631.1	0.56478	2	Bacteria
CAF0702637.1	0.522708	2	Bacteria
CAF0702646.1	0.605816	2	Bacteria
CAF0702674.1	0.483489	2	Bacteria
CAF0702707.1	0.589064	2	Bacteria
CAF0702731.1	0.414045	2	Bacteria
CAF0702761.1	0.432517	2	Bacteria
CAF0703094.1	0.579907	2	Bacteria
CAF0703217.1	0.586078	2	Bacteria
CAF0703262.1	0.564196	2	Bacteria
CAF0703333.1	0.597239	2	Bacteria
CAF0703397.1	0.377833	2	Bacteria
CAF0703400.1	0.490291	2	Bacteria
CAF0703403.1	0.426597	2	Bacteria
CAF0703511.1	0.503118	2	Bacteria
CAF0703515.1	0.536871	2	Bacteria
CAF0703519.1	0.504448	2	Bacteria
CAF0703587.1	0.454432	2	Bacteria
CAF0703645.1	0.595845	2	Bacteria
CAF0703678.1	0.588697	2	Bacteria
CAF0703720.1	0.568904	2	Bacteria
CAF0703723.1	0.527647	2	Bacteria
CAF0703756.1	0.526937	2	Bacteria
CAF0703855.1	0.603355	2	Bacteria
CAF0703870.1	0.532677	2	Bacteria
CAF0703876.1	0.559108	2	Bacteria
CAF0703928.1	0.465548	2	Bacteria
CAF0703940.1	0.532466	2	Bacteria
CAF0704420.1	0.611767	2	Bacteria
CAF0704422.1	0.603527	2	Bacteria
CAF0704432.1	0.567115	2	Bacteria
CAF0704434.1	0.596062	2	Bacteria
CAF0704464.1	0.581362	2	Bacteria
CAF0704484.1	0.545299	2	Bacteria
CAF0704486.1	0.610124	2	Bacteria
CAF0704498.1	0.562082	2	Bacteria
CAF0704504.1	0.579001	2	Bacteria
CAF0704543.1	0.478125	2	Bacteria
CAF0704564.1	0.600278	2	Bacteria
CAF0704570.1	0.512262	2	Bacteria
CAF0704579.1	0.432432	2	Bacteria
CAF0704587.1	0.587934	2	Bacteria
CAF0704591.1	0.604506	2	Bacteria
CAF0704962.1	0.501026	2	Bacteria
CAF0704972.1	0.59623	2	Bacteria
CAF0704978.1	0.358009	2	Bacteria
CAF0704994.1	0.381674	2	Bacteria
CAF0705078.1	0.605605	2	Bacteria
CAF0705207.1	0.602604	2	Bacteria
CAF0705247.1	0.566888	2	Bacteria
CAF0705269.1	0.598	2	Bacteria
CAF0705285.1	0.570123	2	Bacteria
CAF0705287.1	0.517265	2	Bacteria
CAF0705297.1	0.594387	2	Bacteria
CAF0705301.1	0.613165	2	Bacteria
CAF0705317.1	0.511096	2	Bacteria
CAF0705342.1	0.589276	2	Bacteria
CAF0705351.1	0.597618	2	Bacteria
CAF0705368.1	0.611744	2	Bacteria
CAF0705419.1	0.604879	2	Bacteria
CAF0705422.1	0.608971	2	Bacteria
CAF0696230.1	0.497829	200795	Chloroflexi
CAF0693519.1	0.583732	201174	Actinobacteria
CAF0689803.1	0.529998	202907	Collimonas
CAF0691390.1	0.576404	2033718	Candidatus Methylomirabilis limnetica
CAF0689929.1	0.598697	204434	Acidobacteriaceae
CAF0703765.1	0.520618	2626047	unclassified Synechococcus
CAF0692608.1	0.554784	28216	Betaproteobacteria
CAF0701973.1	0.53668	28221	Deltaproteobacteria
CAF0691399.1	0.606042	32064	Chloroflexales
CAF0694667.1	0.574903	32064	Chloroflexales
CAF0700721.1	0.536929	32069	Aquificales
CAF0692942.1	0.576566	335543	Syntrophobacter fumaroxidans MPOB
CAF0689639.1	0.581735	388463	Edaphobacter
CAF0689645.1	0.471616	388463	Edaphobacter
CAF0701929.1	0.557031	403	Methylococcaceae
CAF0692906.1	0.596077	4762	Oomycota
CAF0705408.1	0.603916	555779	Desulfonatronospira thiodismutans ASO3-1
CAF0705412.1	0.577708	555779	Desulfonatronospira thiodismutans ASO3-1
CAF0705416.1	0.564109	555779	Desulfonatronospira thiodismutans ASO3-1
CAF0698924.1	0.527611	57723	Acidobacteria
CAF0700939.1	0.506137	57723	Acidobacteria
CAF0689181.1	0.546193	65551	Meiothermus
CAF0692406.1	0.61234	67819	Armatimonadetes
CAF0705271.1	0.549272	68336	Bacteroidetes/Chlorobi group
CAF0703669.1	0.549094	69541	Desulfuromonadales
CAF0695415.1	0.5087	73778	Methylocaldum
CAF0696322.1	0.595339	73918	Thermaerobacter
CAF0697554.1	0.505504	768669	Thermogemmatispora
CAF0705213.1	0.544413	80864	Comamonadaceae
CAF0701230.1	0.524632	976	Bacteroidetes
WP_009059958.1	0.574785	119977	Acidithiobacillus
WP_009058102.1	0.610859	1224	Proteobacteria
WP_009058141.1	0.599566	1224	Proteobacteria
WP_009058304.1	0.588488	1224	Proteobacteria
WP_009058467.1	0.537354	1224	Proteobacteria
WP_009058535.1	0.599078	1224	Proteobacteria
WP_009058602.1	0.601863	1224	Proteobacteria
WP_009058886.1	0.522901	1224	Proteobacteria
WP_009058926.1	0.534469	1224	Proteobacteria
WP_009058939.1	0.573973	1224	Proteobacteria
WP_009058940.1	0.611747	1224	Proteobacteria
WP_009058941.1	0.502004	1224	Proteobacteria
WP_009058956.1	0.575281	1224	Proteobacteria
WP_009059279.1	0.460592	1224	Proteobacteria
WP_009059355.1	0.481564	1224	Proteobacteria
WP_009059408.1	0.523114	1224	Proteobacteria
WP_009059529.1	0.513224	1224	Proteobacteria
WP_009059759.1	0.541866	1224	Proteobacteria
WP_009060096.1	0.51799	1224	Proteobacteria
WP_009060097.1	0.487135	1224	Proteobacteria
WP_009060099.1	0.547925	1224	Proteobacteria
WP_009060101.1	0.504825	1224	Proteobacteria
WP_009060103.1	0.581648	1224	Proteobacteria
WP_009060105.1	0.606918	1224	Proteobacteria
WP_009060109.1	0.61386	1224	Proteobacteria
WP_009060111.1	0.525202	1224	Proteobacteria
WP_009060113.1	0.587111	1224	Proteobacteria
WP_009060115.1	0.610239	1224	Proteobacteria
WP_009060117.1	0.560944	1224	Proteobacteria
WP_009060119.1	0.468251	1224	Proteobacteria
WP_009060120.1	0.500693	1224	Proteobacteria
WP_009060123.1	0.540175	1224	Proteobacteria
WP_009060124.1	0.375013	1224	Proteobacteria
WP_009060136.1	0.451291	1224	Proteobacteria
WP_009060138.1	0.453496	1224	Proteobacteria
WP_009060148.1	0.562398	1224	Proteobacteria
WP_009060435.1	0.569429	1224	Proteobacteria
WP_009060437.1	0.578338	1224	Proteobacteria
WP_009060499.1	0.514418	1224	Proteobacteria
WP_009060520.1	0.540579	1224	Proteobacteria
WP_009060744.1	0.609653	1224	Proteobacteria
WP_009060852.1	0.578357	1224	Proteobacteria
WP_009060928.1	0.575484	1224	Proteobacteria
WP_009061108.1	0.613987	1224	Proteobacteria
WP_009061217.1	0.547061	1224	Proteobacteria
WP_045086426.1	0.597193	1224	Proteobacteria
WP_079199454.1	0.521818	1224	Proteobacteria
WP_079199478.1	0.571702	1224	Proteobacteria
WP_009059981.1	0.531363	1234	Nitrospira
WP_009060931.1	0.598577	1234	Nitrospira
WP_009060327.1	0.599431	1236	Gammaproteobacteria
WP_009060463.1	0.548991	1236	Gammaproteobacteria
WP_009059138.1	0.521186	1239	Firmicutes
WP_009060720.1	0.575368	1239	Firmicutes
WP_009061659.1	0.571232	1239	Firmicutes
WP_009058039.1	0.475002	131567	cellular organisms
WP_009058097.1	0.572386	131567	cellular organisms
WP_009058143.1	0.555993	131567	cellular organisms
WP_009058322.1	0.613979	131567	cellular organisms
WP_009058389.1	0.566549	131567	cellular organisms
WP_009058663.1	0.547325	131567	cellular organisms
WP_009058790.1	0.527473	131567	cellular organisms
WP_009058946.1	0.473645	131567	cellular organisms
WP_009059056.1	0.587883	131567	cellular organisms
WP_009059335.1	0.550657	131567	cellular organisms
WP_009059473.1	0.538305	131567	cellular organisms
WP_009059578.1	0.59051	131567	cellular organisms
WP_009059641.1	0.55898	131567	cellular organisms
WP_009059712.1	0.537581	131567	cellular organisms
WP_009059867.1	0.587192	131567	cellular organisms
WP_009059885.1	0.512339	131567	cellular organisms
WP_009059894.1	0.563024	131567	cellular organisms
WP_009060118.1	0.55676	131567	cellular organisms
WP_009060244.1	0.497585	131567	cellular organisms
WP_009060323.1	0.550873	131567	cellular organisms
WP_009060590.1	0.537482	131567	cellular organisms
WP_009060594.1	0.596364	131567	cellular organisms
WP_009060663.1	0.571101	131567	cellular organisms
WP_009060673.1	0.544394	131567	cellular organisms
WP_009060771.1	0.402617	131567	cellular organisms
WP_009060900.1	0.598348	131567	cellular organisms
WP_009061101.1	0.586478	131567	cellular organisms
WP_009061110.1	0.429851	131567	cellular organisms
WP_009061118.1	0.567887	131567	cellular organisms
WP_009061183.1	0.589027	131567	cellular organisms
WP_009061399.1	0.599438	131567	cellular organisms
WP_009061525.1	0.580463	131567	cellular organisms
WP_009061542.1	0.589552	131567	cellular organisms
WP_009061754.1	0.576458	131567	cellular organisms
WP_009061759.1	0.608921	131567	cellular organisms
WP_009061764.1	0.582024	131567	cellular organisms
WP_009061920.1	0.500824	131567	cellular organisms
WP_009061923.1	0.588556	131567	cellular organisms
WP_009061985.1	0.533424	131567	cellular organisms
WP_009062070.1	0.570471	131567	cellular organisms
WP_045086795.1	0.528104	131567	cellular organisms
WP_052671921.1	0.57726	131567	cellular organisms
WP_009058617.1	0.599955	1385	Bacillales
WP_009058805.1	0.586693	1783272	Terrabacteria group
WP_009059725.1	0.536517	1783272	Terrabacteria group
WP_009061022.1	0.581138	1783272	Terrabacteria group
WP_009061228.1	0.5584	1783272	Terrabacteria group
WP_009061233.1	0.33425	1783272	Terrabacteria group
WP_009059883.1	0.546978	188786	Thermaceae
WP_009059890.1	0.607027	188786	Thermaceae
WP_009061873.1	0.575016	188786	Thermaceae
WP_009059337.1	0.588605	188787	Deinococci
WP_009061814.1	0.55308	188787	Deinococci
WP_009058029.1	0.503679	2	Bacteria
WP_009058041.1	0.570225	2	Bacteria
WP_009058076.1	0.59827	2	Bacteria
WP_009058082.1	0.53374	2	Bacteria
WP_009058096.1	0.533634	2	Bacteria
WP_009058123.1	0.578694	2	Bacteria
WP_009058144.1	0.505006	2	Bacteria
WP_009058154.1	0.504264	2	Bacteria
WP_009058163.1	0.415967	2	Bacteria
WP_009058164.1	0.545908	2	Bacteria
WP_009058165.1	0.476222	2	Bacteria
WP_009058173.1	0.574766	2	Bacteria
WP_009058176.1	0.608644	2	Bacteria
WP_009058177.1	0.591242	2	Bacteria
WP_009058196.1	0.613748	2	Bacteria
WP_009058199.1	0.588582	2	Bacteria
WP_009058215.1	0.580444	2	Bacteria
WP_009058226.1	0.550128	2	Bacteria
WP_009058254.1	0.505979	2	Bacteria
WP_009058269.1	0.530446	2	Bacteria
WP_009058271.1	0.603976	2	Bacteria
WP_009058294.1	0.579183	2	Bacteria
WP_009058295.1	0.58883	2	Bacteria
WP_009058296.1	0.60041	2	Bacteria
WP_009058317.1	0.57054	2	Bacteria
WP_009058324.1	0.531359	2	Bacteria
WP_009058332.1	0.598806	2	Bacteria
WP_009058350.1	0.573481	2	Bacteria
WP_009058386.1	0.574824	2	Bacteria
WP_009058411.1	0.572736	2	Bacteria
WP_009058441.1	0.562597	2	Bacteria
WP_009058455.1	0.554353	2	Bacteria
WP_009058456.1	0.51908	2	Bacteria
WP_009058479.1	0.538917	2	Bacteria
WP_009058500.1	0.6026	2	Bacteria
WP_009058530.1	0.537897	2	Bacteria
WP_009058563.1	0.505414	2	Bacteria
WP_009058566.1	0.543836	2	Bacteria
WP_009058575.1	0.513353	2	Bacteria
WP_009058577.1	0.611792	2	Bacteria
WP_009058589.1	0.606886	2	Bacteria
WP_009058606.1	0.590166	2	Bacteria
WP_009058611.1	0.577923	2	Bacteria
WP_009058613.1	0.581408	2	Bacteria
WP_009058626.1	0.609469	2	Bacteria
WP_009058630.1	0.577094	2	Bacteria
WP_009058632.1	0.573071	2	Bacteria
WP_009058634.1	0.523489	2	Bacteria
WP_009058636.1	0.579543	2	Bacteria
WP_009058664.1	0.578749	2	Bacteria
WP_009058675.1	0.571707	2	Bacteria
WP_009058713.1	0.581899	2	Bacteria
WP_009058724.1	0.611555	2	Bacteria
WP_009058726.1	0.588531	2	Bacteria
WP_009058732.1	0.603134	2	Bacteria
WP_009058735.1	0.604275	2	Bacteria
WP_009058741.1	0.55563	2	Bacteria
WP_009058756.1	0.606737	2	Bacteria
WP_009058779.1	0.542974	2	Bacteria
WP_009058795.1	0.588574	2	Bacteria
WP_009058797.1	0.575873	2	Bacteria
WP_009058801.1	0.551057	2	Bacteria
WP_009058802.1	0.53997	2	Bacteria
WP_009058803.1	0.592432	2	Bacteria
WP_009058804.1	0.604124	2	Bacteria
WP_009058818.1	0.582428	2	Bacteria
WP_009058819.1	0.546737	2	Bacteria
WP_009058820.1	0.566305	2	Bacteria
WP_009058838.1	0.549705	2	Bacteria
WP_009058879.1	0.456068	2	Bacteria
WP_009058892.1	0.5786	2	Bacteria
WP_009058898.1	0.588128	2	Bacteria
WP_009058945.1	0.588682	2	Bacteria
WP_009058948.1	0.572696	2	Bacteria
WP_009058950.1	0.535086	2	Bacteria
WP_009058951.1	0.495281	2	Bacteria
WP_009058954.1	0.548738	2	Bacteria
WP_009058957.1	0.607083	2	Bacteria
WP_009058960.1	0.522302	2	Bacteria
WP_009058961.1	0.556186	2	Bacteria
WP_009059081.1	0.596102	2	Bacteria
WP_009059115.1	0.586639	2	Bacteria
WP_009059169.1	0.590013	2	Bacteria
WP_009059199.1	0.533394	2	Bacteria
WP_009059202.1	0.540746	2	Bacteria
WP_009059223.1	0.591897	2	Bacteria
WP_009059240.1	0.544706	2	Bacteria
WP_009059267.1	0.5923	2	Bacteria
WP_009059277.1	0.535542	2	Bacteria
WP_009059278.1	0.61371	2	Bacteria
WP_009059307.1	0.527165	2	Bacteria
WP_009059316.1	0.59824	2	Bacteria
WP_009059321.1	0.591759	2	Bacteria
WP_009059323.1	0.564477	2	Bacteria
WP_009059326.1	0.573545	2	Bacteria
WP_009059328.1	0.604307	2	Bacteria
WP_009059338.1	0.526281	2	Bacteria
WP_009059339.1	0.572127	2	Bacteria
WP_009059340.1	0.587788	2	Bacteria
WP_009059345.1	0.598089	2	Bacteria
WP_009059347.1	0.577732	2	Bacteria
WP_009059349.1	0.502264	2	Bacteria
WP_009059370.1	0.569439	2	Bacteria
WP_009059407.1	0.588832	2	Bacteria
WP_009059409.1	0.585905	2	Bacteria
WP_009059413.1	0.512486	2	Bacteria
WP_009059414.1	0.58607	2	Bacteria
WP_009059415.1	0.607687	2	Bacteria
WP_009059443.1	0.527858	2	Bacteria
WP_009059445.1	0.577811	2	Bacteria
WP_009059460.1	0.569842	2	Bacteria
WP_009059461.1	0.606351	2	Bacteria
WP_009059462.1	0.566465	2	Bacteria
WP_009059482.1	0.526625	2	Bacteria
WP_009059489.1	0.546465	2	Bacteria
WP_009059495.1	0.591636	2	Bacteria
WP_009059525.1	0.548667	2	Bacteria
WP_009059540.1	0.458974	2	Bacteria
WP_009059542.1	0.524081	2	Bacteria
WP_009059544.1	0.5788	2	Bacteria
WP_009059569.1	0.591767	2	Bacteria
WP_009059624.1	0.567676	2	Bacteria
WP_009059638.1	0.542982	2	Bacteria
WP_009059640.1	0.543954	2	Bacteria
WP_009059661.1	0.581222	2	Bacteria
WP_009059663.1	0.513388	2	Bacteria
WP_009059736.1	0.603566	2	Bacteria
WP_009059737.1	0.606462	2	Bacteria
WP_009059757.1	0.349321	2	Bacteria
WP_009059758.1	0.358143	2	Bacteria
WP_009059764.1	0.565361	2	Bacteria
WP_009059782.1	0.59588	2	Bacteria
WP_009059784.1	0.54412	2	Bacteria
WP_009059826.1	0.608527	2	Bacteria
WP_009059855.1	0.551309	2	Bacteria
WP_009059947.1	0.564488	2	Bacteria
WP_009059966.1	0.580849	2	Bacteria
WP_009059970.1	0.52348	2	Bacteria
WP_009059971.1	0.595771	2	Bacteria
WP_009059979.1	0.517366	2	Bacteria
WP_009059998.1	0.612306	2	Bacteria
WP_009060012.1	0.564293	2	Bacteria
WP_009060014.1	0.403348	2	Bacteria
WP_009060090.1	0.520429	2	Bacteria
WP_009060125.1	0.605266	2	Bacteria
WP_009060127.1	0.604901	2	Bacteria
WP_009060129.1	0.524625	2	Bacteria
WP_009060134.1	0.501688	2	Bacteria
WP_009060145.1	0.317793	2	Bacteria
WP_009060147.1	0.589958	2	Bacteria
WP_009060152.1	0.539617	2	Bacteria
WP_009060154.1	0.50235	2	Bacteria
WP_009060192.1	0.563128	2	Bacteria
WP_009060199.1	0.539862	2	Bacteria
WP_009060225.1	0.44042	2	Bacteria
WP_009060229.1	0.501553	2	Bacteria
WP_009060245.1	0.547634	2	Bacteria
WP_009060325.1	0.570009	2	Bacteria
WP_009060341.1	0.507681	2	Bacteria
WP_009060345.1	0.565766	2	Bacteria
WP_009060419.1	0.545007	2	Bacteria
WP_009060448.1	0.518012	2	Bacteria
WP_009060450.1	0.597534	2	Bacteria
WP_009060452.1	0.614035	2	Bacteria
WP_009060467.1	0.573994	2	Bacteria
WP_009060482.1	0.596944	2	Bacteria
WP_009060503.1	0.612875	2	Bacteria
WP_009060524.1	0.598904	2	Bacteria
WP_009060526.1	0.52399	2	Bacteria
WP_009060528.1	0.568984	2	Bacteria
WP_009060529.1	0.491433	2	Bacteria
WP_009060531.1	0.572283	2	Bacteria
WP_009060533.1	0.50237	2	Bacteria
WP_009060556.1	0.553722	2	Bacteria
WP_009060562.1	0.510207	2	Bacteria
WP_009060613.1	0.609262	2	Bacteria
WP_009060704.1	0.504127	2	Bacteria
WP_009060710.1	0.568532	2	Bacteria
WP_009060729.1	0.592342	2	Bacteria
WP_009060733.1	0.590034	2	Bacteria
WP_009060734.1	0.553642	2	Bacteria
WP_009060740.1	0.590724	2	Bacteria
WP_009060759.1	0.578668	2	Bacteria
WP_009060760.1	0.500485	2	Bacteria
WP_009060762.1	0.514082	2	Bacteria
WP_009060783.1	0.542715	2	Bacteria
WP_009060784.1	0.610623	2	Bacteria
WP_009060791.1	0.55681	2	Bacteria
WP_009060793.1	0.506277	2	Bacteria
WP_009060795.1	0.564539	2	Bacteria
WP_009060797.1	0.579973	2	Bacteria
WP_009060846.1	0.575888	2	Bacteria
WP_009060848.1	0.602144	2	Bacteria
WP_009060850.1	0.595678	2	Bacteria
WP_009060872.1	0.581908	2	Bacteria
WP_009060882.1	0.57792	2	Bacteria
WP_009060883.1	0.515457	2	Bacteria
WP_009060886.1	0.597854	2	Bacteria
WP_009060888.1	0.613387	2	Bacteria
WP_009060892.1	0.581902	2	Bacteria
WP_009060894.1	0.414219	2	Bacteria
WP_009060898.1	0.613857	2	Bacteria
WP_009060924.1	0.555939	2	Bacteria
WP_009060929.1	0.610316	2	Bacteria
WP_009060933.1	0.540955	2	Bacteria
WP_009060965.1	0.54859	2	Bacteria
WP_009060967.1	0.572769	2	Bacteria
WP_009060994.1	0.554637	2	Bacteria
WP_009060998.1	0.61285	2	Bacteria
WP_009061028.1	0.613105	2	Bacteria
WP_009061045.1	0.547938	2	Bacteria
WP_009061059.1	0.59784	2	Bacteria
WP_009061065.1	0.577095	2	Bacteria
WP_009061093.1	0.605617	2	Bacteria
WP_009061094.1	0.598578	2	Bacteria
WP_009061120.1	0.548449	2	Bacteria
WP_009061125.1	0.584766	2	Bacteria
WP_009061139.1	0.505934	2	Bacteria
WP_009061141.1	0.601536	2	Bacteria
WP_009061148.1	0.551054	2	Bacteria
WP_009061159.1	0.526509	2	Bacteria
WP_009061180.1	0.590553	2	Bacteria
WP_009061206.1	0.532327	2	Bacteria
WP_009061208.1	0.412642	2	Bacteria
WP_009061212.1	0.606612	2	Bacteria
WP_009061229.1	0.562408	2	Bacteria
WP_009061231.1	0.351414	2	Bacteria
WP_009061237.1	0.555208	2	Bacteria
WP_009061281.1	0.526847	2	Bacteria
WP_009061283.1	0.555293	2	Bacteria
WP_009061307.1	0.540997	2	Bacteria
WP_009061323.1	0.565535	2	Bacteria
WP_009061347.1	0.509671	2	Bacteria
WP_009061357.1	0.512287	2	Bacteria
WP_009061367.1	0.588984	2	Bacteria
WP_009061370.1	0.613853	2	Bacteria
WP_009061409.1	0.550917	2	Bacteria
WP_009061482.1	0.586948	2	Bacteria
WP_009061513.1	0.530506	2	Bacteria
WP_009061516.1	0.574359	2	Bacteria
WP_009061550.1	0.515091	2	Bacteria
WP_009061579.1	0.603321	2	Bacteria
WP_009061597.1	0.566138	2	Bacteria
WP_009061629.1	0.564962	2	Bacteria
WP_009061656.1	0.534587	2	Bacteria
WP_009061685.1	0.524035	2	Bacteria
WP_009061694.1	0.584819	2	Bacteria
WP_009061698.1	0.611455	2	Bacteria
WP_009061704.1	0.55974	2	Bacteria
WP_009061707.1	0.551476	2	Bacteria
WP_009061713.1	0.552177	2	Bacteria
WP_009061739.1	0.511353	2	Bacteria
WP_009061747.1	0.608687	2	Bacteria
WP_009061749.1	0.568637	2	Bacteria
WP_009061756.1	0.598963	2	Bacteria
WP_009061766.1	0.612177	2	Bacteria
WP_009061779.1	0.530143	2	Bacteria
WP_009061784.1	0.570169	2	Bacteria
WP_009061856.1	0.414126	2	Bacteria
WP_009061878.1	0.54889	2	Bacteria
WP_009061903.1	0.596314	2	Bacteria
WP_009061935.1	0.530602	2	Bacteria
WP_009061951.1	0.57203	2	Bacteria
WP_009061959.1	0.557507	2	Bacteria
WP_009061960.1	0.551106	2	Bacteria
WP_009061974.1	0.491522	2	Bacteria
WP_009061983.1	0.522399	2	Bacteria
WP_009061991.1	0.608943	2	Bacteria
WP_009062077.1	0.522254	2	Bacteria
WP_045086414.1	0.554901	2	Bacteria
WP_045086428.1	0.559641	2	Bacteria
WP_045086510.1	0.525678	2	Bacteria
WP_045086539.1	0.544069	2	Bacteria
WP_045086567.1	0.510216	2	Bacteria
WP_045086583.1	0.505082	2	Bacteria
WP_045086586.1	0.60506	2	Bacteria
WP_045086927.1	0.587858	2	Bacteria
WP_048814740.1	0.608135	2	Bacteria
WP_079199455.1	0.589144	2	Bacteria
WP_079199461.1	0.557574	2	Bacteria
WP_079199572.1	0.612527	2	Bacteria
WP_079199575.1	0.575255	2	Bacteria
WP_079199611.1	0.540922	2	Bacteria
WP_079199637.1	0.534104	2	Bacteria
WP_009060746.1	0.542275	201174	Actinobacteria
WP_009060397.1	0.604198	204434	Acidobacteriaceae
WP_009058358.1	0.613668	2528026	Maioricimonas rarisocia
WP_009058139.1	0.524155	28216	Betaproteobacteria
WP_045086914.1	0.591131	28216	Betaproteobacteria
WP_009059188.1	0.522097	28231	Geobacter
WP_009060227.1	0.591475	32064	Chloroflexales
WP_079199584.1	0.587589	349163	Acidiphilium cryptum JF-5
WP_079199588.1	0.590815	349163	Acidiphilium cryptum JF-5
WP_079199592.1	0.590201	349163	Acidiphilium cryptum JF-5
WP_079199596.1	0.58932	349163	Acidiphilium cryptum JF-5
WP_079199601.1	0.589522	349163	Acidiphilium cryptum JF-5
WP_079199605.1	0.589529	349163	Acidiphilium cryptum JF-5
WP_079199607.1	0.5883	349163	Acidiphilium cryptum JF-5
WP_079199612.1	0.591444	349163	Acidiphilium cryptum JF-5
WP_079199620.1	0.590805	349163	Acidiphilium cryptum JF-5
WP_079199623.1	0.586063	349163	Acidiphilium cryptum JF-5
WP_009061026.1	0.605521	356	Rhizobiales
WP_009058937.1	0.57575	403	Methylococcaceae
WP_009059881.1	0.54496	403	Methylococcaceae
WP_009059840.1	0.576334	555779	Desulfonatronospira thiodismutans ASO3-1
WP_009059842.1	0.526952	555779	Desulfonatronospira thiodismutans ASO3-1
WP_009058674.1	0.605282	563843	Rhodothermaceae
WP_009059964.1	0.570818	575540	Isosphaera pallida ATCC 43644
WP_009060599.1	0.554003	68336	Bacteroidetes/Chlorobi group
WP_009060786.1	0.57587	68336	Bacteroidetes/Chlorobi group
WP_009058090.1	0.574893	976	Bacteroidetes
ACD82383.1	0.53248	105559	Nitrosococcus watsonii C-113
ACD82321.1	0.593074	1224	Proteobacteria
ACD82511.1	0.38523	1224	Proteobacteria
ACD82512.1	0.539821	1224	Proteobacteria
ACD82515.1	0.512398	1224	Proteobacteria
ACD82516.1	0.460166	1224	Proteobacteria
ACD82518.1	0.570628	1224	Proteobacteria
ACD82522.1	0.612121	1224	Proteobacteria
ACD82527.1	0.614067	1224	Proteobacteria
ACD82529.1	0.602904	1224	Proteobacteria
ACD82530.1	0.598724	1224	Proteobacteria
ACD82531.1	0.505465	1224	Proteobacteria
ACD82532.1	0.546225	1224	Proteobacteria
ACD82533.1	0.489736	1224	Proteobacteria
ACD82534.1	0.557476	1224	Proteobacteria
ACD82566.1	0.542597	1224	Proteobacteria
ACD82573.1	0.513268	1224	Proteobacteria
ACD82691.1	0.598161	1224	Proteobacteria
ACD82772.1	0.610589	1224	Proteobacteria
ACD82773.1	0.603034	1224	Proteobacteria
ACD82898.1	0.578013	1224	Proteobacteria
ACD82950.1	0.509784	1224	Proteobacteria
ACD82951.1	0.611989	1224	Proteobacteria
ACD82952.1	0.587311	1224	Proteobacteria
ACD82960.1	0.522849	1224	Proteobacteria
ACD82987.1	0.532287	1224	Proteobacteria
ACD83026.1	0.584381	1224	Proteobacteria
ACD83028.1	0.563791	1224	Proteobacteria
ACD83192.1	0.60097	1224	Proteobacteria
ACD83288.1	0.613621	1224	Proteobacteria
ACD83373.1	0.554322	1224	Proteobacteria
ACD83438.1	0.579105	1224	Proteobacteria
ACD83570.1	0.577442	1224	Proteobacteria
ACD83637.1	0.6098	1224	Proteobacteria
ACD83638.1	0.462831	1224	Proteobacteria
ACD83664.1	0.613523	1224	Proteobacteria
ACD83675.1	0.524175	1224	Proteobacteria
ACD83680.1	0.574085	1224	Proteobacteria
ACD83738.1	0.484076	1224	Proteobacteria
ACD83783.1	0.523966	1224	Proteobacteria
ACD83923.1	0.491623	1224	Proteobacteria
ACD83924.1	0.446366	1224	Proteobacteria
ACD83925.1	0.50842	1224	Proteobacteria
ACD83985.1	0.592759	1224	Proteobacteria
ACD84053.1	0.569075	1224	Proteobacteria
ACD84054.1	0.565293	1224	Proteobacteria
ACD84282.1	0.508322	1230846	Acidobacteria bacterium AB60
ACD82770.1	0.592331	1234	Nitrospira
ACD83337.1	0.528656	1234	Nitrospira
ACD84067.1	0.55026	1236	Gammaproteobacteria
ACD82503.1	0.533768	1239	Firmicutes
ACD83665.1	0.504959	1239	Firmicutes
ACD84215.1	0.526428	1239	Firmicutes
ACD84302.1	0.55542	1239	Firmicutes
ACD82080.1	0.4931	131567	cellular organisms
ACD82100.1	0.552006	131567	cellular organisms
ACD82161.1	0.573884	131567	cellular organisms
ACD82195.1	0.559385	131567	cellular organisms
ACD82201.1	0.563026	131567	cellular organisms
ACD82219.1	0.54158	131567	cellular organisms
ACD82329.1	0.584317	131567	cellular organisms
ACD82449.1	0.512743	131567	cellular organisms
ACD82517.1	0.60696	131567	cellular organisms
ACD82546.1	0.613186	131567	cellular organisms
ACD82658.1	0.397037	131567	cellular organisms
ACD82671.1	0.537845	131567	cellular organisms
ACD82674.1	0.600549	131567	cellular organisms
ACD82684.1	0.597593	131567	cellular organisms
ACD82695.1	0.613955	131567	cellular organisms
ACD82798.1	0.583111	131567	cellular organisms
ACD82846.1	0.58919	131567	cellular organisms
ACD83013.1	0.531758	131567	cellular organisms
ACD83052.1	0.546819	131567	cellular organisms
ACD83091.1	0.559058	131567	cellular organisms
ACD83124.1	0.539279	131567	cellular organisms
ACD83166.1	0.519337	131567	cellular organisms
ACD83203.1	0.543514	131567	cellular organisms
ACD83263.1	0.588888	131567	cellular organisms
ACD83281.1	0.537886	131567	cellular organisms
ACD83299.1	0.454407	131567	cellular organisms
ACD83311.1	0.514616	131567	cellular organisms
ACD83484.1	0.558053	131567	cellular organisms
ACD83486.1	0.578275	131567	cellular organisms
ACD83628.1	0.529344	131567	cellular organisms
ACD83642.1	0.584082	131567	cellular organisms
ACD83695.1	0.501334	131567	cellular organisms
ACD83782.1	0.565393	131567	cellular organisms
ACD83830.1	0.508211	131567	cellular organisms
ACD83856.1	0.606566	131567	cellular organisms
ACD83869.1	0.587684	131567	cellular organisms
ACD83881.1	0.518281	131567	cellular organisms
ACD83892.1	0.536263	131567	cellular organisms
ACD83898.1	0.590783	131567	cellular organisms
ACD83902.1	0.568885	131567	cellular organisms
ACD83981.1	0.576161	131567	cellular organisms
ACD83984.1	0.540872	131567	cellular organisms
ACD84116.1	0.504649	131567	cellular organisms
ACD84172.1	0.584566	131567	cellular organisms
ACD84183.1	0.566873	131567	cellular organisms
ACD84187.1	0.517977	131567	cellular organisms
ACD84373.1	0.612484	131567	cellular organisms
ACD84386.1	0.612871	131567	cellular organisms
ACD84401.1	0.552603	131567	cellular organisms
ACD84441.1	0.584856	131567	cellular organisms
ACD84444.1	0.519278	131567	cellular organisms
ACD84445.1	0.582362	131567	cellular organisms
ACD84497.1	0.555844	131567	cellular organisms
ACD84530.1	0.57579	131567	cellular organisms
ACD83146.1	0.599582	1385	Bacillales
ACD82464.1	0.577768	1783272	Terrabacteria group
ACD83041.1	0.590113	1783272	Terrabacteria group
ACD83573.1	0.529997	1783272	Terrabacteria group
ACD83649.1	0.535066	1783272	Terrabacteria group
ACD83784.1	0.595181	1783272	Terrabacteria group
ACD83850.1	0.585344	1783272	Terrabacteria group
ACD84209.1	0.51385	1783272	Terrabacteria group
ACD84372.1	0.604648	1783272	Terrabacteria group
ACD84208.1	0.551352	188786	Thermaceae
ACD84211.1	0.610246	188786	Thermaceae
ACD84493.1	0.587746	188786	Thermaceae
ACD82682.1	0.589581	188787	Deinococci
ACD84469.1	0.577852	188787	Deinococci
ACD82065.1	0.586185	2	Bacteria
ACD82075.1	0.566544	2	Bacteria
ACD82081.1	0.556355	2	Bacteria
ACD82082.1	0.51193	2	Bacteria
ACD82092.1	0.489379	2	Bacteria
ACD82099.1	0.501288	2	Bacteria
ACD82102.1	0.603167	2	Bacteria
ACD82129.1	0.566243	2	Bacteria
ACD82155.1	0.50388	2	Bacteria
ACD82158.1	0.513834	2	Bacteria
ACD82162.1	0.503818	2	Bacteria
ACD82167.1	0.571211	2	Bacteria
ACD82188.1	0.555321	2	Bacteria
ACD82190.1	0.58999	2	Bacteria
ACD82229.1	0.570961	2	Bacteria
ACD82234.1	0.59579	2	Bacteria
ACD82236.1	0.582954	2	Bacteria
ACD82245.1	0.608726	2	Bacteria
ACD82247.1	0.59316	2	Bacteria
ACD82258.1	0.546717	2	Bacteria
ACD82276.1	0.520642	2	Bacteria
ACD82292.1	0.533891	2	Bacteria
ACD82294.1	0.604105	2	Bacteria
ACD82311.1	0.552771	2	Bacteria
ACD82315.1	0.579958	2	Bacteria
ACD82317.1	0.597278	2	Bacteria
ACD82343.1	0.583549	2	Bacteria
ACD82361.1	0.58606	2	Bacteria
ACD82362.1	0.533903	2	Bacteria
ACD82364.1	0.466279	2	Bacteria
ACD82373.1	0.552522	2	Bacteria
ACD82381.1	0.592247	2	Bacteria
ACD82384.1	0.58136	2	Bacteria
ACD82392.1	0.554259	2	Bacteria
ACD82402.1	0.522195	2	Bacteria
ACD82416.1	0.591461	2	Bacteria
ACD82426.1	0.580962	2	Bacteria
ACD82431.1	0.520247	2	Bacteria
ACD82432.1	0.520225	2	Bacteria
ACD82433.1	0.561673	2	Bacteria
ACD82438.1	0.527494	2	Bacteria
ACD82450.1	0.58663	2	Bacteria
ACD82451.1	0.605444	2	Bacteria
ACD82452.1	0.565227	2	Bacteria
ACD82456.1	0.598334	2	Bacteria
ACD82461.1	0.613944	2	Bacteria
ACD82502.1	0.598453	2	Bacteria
ACD82506.1	0.536599	2	Bacteria
ACD82507.1	0.593357	2	Bacteria
ACD82509.1	0.591925	2	Bacteria
ACD82524.1	0.579942	2	Bacteria
ACD82525.1	0.612821	2	Bacteria
ACD82526.1	0.533539	2	Bacteria
ACD82539.1	0.529117	2	Bacteria
ACD82544.1	0.572806	2	Bacteria
ACD82557.1	0.585226	2	Bacteria
ACD82558.1	0.566196	2	Bacteria
ACD82559.1	0.496992	2	Bacteria
ACD82561.1	0.557928	2	Bacteria
ACD82567.1	0.515172	2	Bacteria
ACD82568.1	0.601094	2	Bacteria
ACD82569.1	0.530879	2	Bacteria
ACD82570.1	0.560857	2	Bacteria
ACD82571.1	0.484233	2	Bacteria
ACD82572.1	0.584831	2	Bacteria
ACD82589.1	0.528349	2	Bacteria
ACD82592.1	0.521445	2	Bacteria
ACD82596.1	0.599201	2	Bacteria
ACD82603.1	0.600546	2	Bacteria
ACD82648.1	0.612341	2	Bacteria
ACD82651.1	0.592877	2	Bacteria
ACD82663.1	0.548017	2	Bacteria
ACD82664.1	0.50266	2	Bacteria
ACD82665.1	0.591016	2	Bacteria
ACD82668.1	0.409416	2	Bacteria
ACD82669.1	0.557254	2	Bacteria
ACD82676.1	0.580985	2	Bacteria
ACD82679.1	0.591663	2	Bacteria
ACD82680.1	0.578052	2	Bacteria
ACD82681.1	0.538301	2	Bacteria
ACD82689.1	0.567368	2	Bacteria
ACD82692.1	0.591839	2	Bacteria
ACD82698.1	0.596693	2	Bacteria
ACD82699.1	0.511858	2	Bacteria
ACD82704.1	0.558879	2	Bacteria
ACD82717.1	0.558561	2	Bacteria
ACD82728.1	0.539364	2	Bacteria
ACD82751.1	0.543182	2	Bacteria
ACD82769.1	0.51517	2	Bacteria
ACD82776.1	0.561224	2	Bacteria
ACD82801.1	0.508001	2	Bacteria
ACD82811.1	0.571913	2	Bacteria
ACD82868.1	0.549317	2	Bacteria
ACD82893.1	0.557135	2	Bacteria
ACD82894.1	0.522041	2	Bacteria
ACD82897.1	0.610027	2	Bacteria
ACD82900.1	0.535258	2	Bacteria
ACD82942.1	0.519033	2	Bacteria
ACD82944.1	0.525696	2	Bacteria
ACD82945.1	0.568484	2	Bacteria
ACD82946.1	0.50801	2	Bacteria
ACD82947.1	0.591638	2	Bacteria
ACD82980.1	0.601663	2	Bacteria
ACD82983.1	0.563193	2	Bacteria
ACD82994.1	0.463489	2	Bacteria
ACD83027.1	0.510307	2	Bacteria
ACD83039.1	0.552048	2	Bacteria
ACD83040.1	0.509283	2	Bacteria
ACD83042.1	0.600692	2	Bacteria
ACD83043.1	0.585987	2	Bacteria
ACD83044.1	0.505823	2	Bacteria
ACD83045.1	0.547384	2	Bacteria
ACD83047.1	0.577063	2	Bacteria
ACD83050.1	0.601185	2	Bacteria
ACD83067.1	0.608948	2	Bacteria
ACD83074.1	0.526158	2	Bacteria
ACD83075.1	0.600804	2	Bacteria
ACD83077.1	0.603957	2	Bacteria
ACD83080.1	0.58215	2	Bacteria
ACD83081.1	0.610785	2	Bacteria
ACD83089.1	0.581351	2	Bacteria
ACD83110.1	0.533209	2	Bacteria
ACD83111.1	0.60545	2	Bacteria
ACD83117.1	0.542405	2	Bacteria
ACD83123.1	0.591808	2	Bacteria
ACD83134.1	0.569252	2	Bacteria
ACD83138.1	0.584748	2	Bacteria
ACD83142.1	0.605136	2	Bacteria
ACD83147.1	0.567211	2	Bacteria
ACD83148.1	0.579585	2	Bacteria
ACD83149.1	0.579829	2	Bacteria
ACD83150.1	0.588357	2	Bacteria
ACD83154.1	0.582479	2	Bacteria
ACD83159.1	0.600554	2	Bacteria
ACD83172.1	0.610805	2	Bacteria
ACD83173.1	0.541191	2	Bacteria
ACD83177.1	0.516688	2	Bacteria
ACD83201.1	0.574114	2	Bacteria
ACD83256.1	0.560576	2	Bacteria
ACD83284.1	0.417799	2	Bacteria
ACD83285.1	0.594624	2	Bacteria
ACD83289.1	0.596146	2	Bacteria
ACD83291.1	0.580867	2	Bacteria
ACD83296.1	0.589804	2	Bacteria
ACD83298.1	0.548131	2	Bacteria
ACD83314.1	0.506479	2	Bacteria
ACD83316.1	0.435957	2	Bacteria
ACD83317.1	0.412918	2	Bacteria
ACD83326.1	0.610654	2	Bacteria
ACD83338.1	0.515902	2	Bacteria
ACD83341.1	0.593816	2	Bacteria
ACD83342.1	0.558086	2	Bacteria
ACD83348.1	0.572733	2	Bacteria
ACD83357.1	0.505149	2	Bacteria
ACD83370.1	0.567571	2	Bacteria
ACD83374.1	0.343422	2	Bacteria
ACD83375.1	0.34777	2	Bacteria
ACD83378.1	0.595986	2	Bacteria
ACD83386.1	0.525236	2	Bacteria
ACD83387.1	0.58752	2	Bacteria
ACD83418.1	0.604573	2	Bacteria
ACD83430.1	0.540059	2	Bacteria
ACD83441.1	0.512708	2	Bacteria
ACD83449.1	0.503225	2	Bacteria
ACD83450.1	0.549423	2	Bacteria
ACD83457.1	0.558706	2	Bacteria
ACD83473.1	0.542088	2	Bacteria
ACD83507.1	0.505951	2	Bacteria
ACD83513.1	0.579748	2	Bacteria
ACD83530.1	0.589324	2	Bacteria
ACD83536.1	0.564753	2	Bacteria
ACD83537.1	0.552537	2	Bacteria
ACD83538.1	0.541953	2	Bacteria
ACD83549.1	0.55956	2	Bacteria
ACD83567.1	0.589191	2	Bacteria
ACD83568.1	0.602798	2	Bacteria
ACD83569.1	0.589066	2	Bacteria
ACD83580.1	0.550764	2	Bacteria
ACD83587.1	0.591917	2	Bacteria
ACD83601.1	0.571414	2	Bacteria
ACD83629.1	0.589157	2	Bacteria
ACD83633.1	0.501318	2	Bacteria
ACD83636.1	0.555965	2	Bacteria
ACD83666.1	0.599661	2	Bacteria
ACD83669.1	0.532409	2	Bacteria
ACD83670.1	0.529431	2	Bacteria
ACD83672.1	0.597987	2	Bacteria
ACD83676.1	0.576308	2	Bacteria
ACD83685.1	0.509338	2	Bacteria
ACD83710.1	0.598806	2	Bacteria
ACD83713.1	0.583825	2	Bacteria
ACD83726.1	0.539551	2	Bacteria
ACD83751.1	0.580503	2	Bacteria
ACD83757.1	0.553148	2	Bacteria
ACD83787.1	0.507412	2	Bacteria
ACD83788.1	0.582891	2	Bacteria
ACD83789.1	0.60822	2	Bacteria
ACD83812.1	0.58846	2	Bacteria
ACD83819.1	0.5152	2	Bacteria
ACD83826.1	0.601795	2	Bacteria
ACD83828.1	0.576574	2	Bacteria
ACD83842.1	0.611747	2	Bacteria
ACD83843.1	0.588139	2	Bacteria
ACD83848.1	0.514081	2	Bacteria
ACD83849.1	0.406162	2	Bacteria
ACD83851.1	0.602322	2	Bacteria
ACD83853.1	0.562026	2	Bacteria
ACD83864.1	0.612924	2	Bacteria
ACD83865.1	0.408592	2	Bacteria
ACD83875.1	0.590768	2	Bacteria
ACD83882.1	0.501953	2	Bacteria
ACD83883.1	0.601135	2	Bacteria
ACD83904.1	0.520525	2	Bacteria
ACD83930.1	0.318796	2	Bacteria
ACD83931.1	0.594229	2	Bacteria
ACD83932.1	0.568404	2	Bacteria
ACD83934.1	0.559143	2	Bacteria
ACD83935.1	0.514694	2	Bacteria
ACD83971.1	0.509	2	Bacteria
ACD83992.1	0.529041	2	Bacteria
ACD83993.1	0.562472	2	Bacteria
ACD84044.1	0.597184	2	Bacteria
ACD84046.1	0.516169	2	Bacteria
ACD84057.1	0.614046	2	Bacteria
ACD84069.1	0.554062	2	Bacteria
ACD84074.1	0.576352	2	Bacteria
ACD84085.1	0.582471	2	Bacteria
ACD84100.1	0.50577	2	Bacteria
ACD84165.1	0.579853	2	Bacteria
ACD84213.1	0.576236	2	Bacteria
ACD84236.1	0.527312	2	Bacteria
ACD84241.1	0.61158	2	Bacteria
ACD84249.1	0.516572	2	Bacteria
ACD84251.1	0.560653	2	Bacteria
ACD84263.1	0.554062	2	Bacteria
ACD84272.1	0.528017	2	Bacteria
ACD84273.1	0.586579	2	Bacteria
ACD84300.1	0.51815	2	Bacteria
ACD84315.1	0.524293	2	Bacteria
ACD84320.1	0.607256	2	Bacteria
ACD84322.1	0.611267	2	Bacteria
ACD84329.1	0.555961	2	Bacteria
ACD84331.1	0.544345	2	Bacteria
ACD84347.1	0.507399	2	Bacteria
ACD84351.1	0.582463	2	Bacteria
ACD84352.1	0.560403	2	Bacteria
ACD84353.1	0.59037	2	Bacteria
ACD84371.1	0.523599	2	Bacteria
ACD84374.1	0.607342	2	Bacteria
ACD84375.1	0.607666	2	Bacteria
ACD84376.1	0.601347	2	Bacteria
ACD84390.1	0.585072	2	Bacteria
ACD84392.1	0.610568	2	Bacteria
ACD84393.1	0.587244	2	Bacteria
ACD84394.1	0.610444	2	Bacteria
ACD84412.1	0.594482	2	Bacteria
ACD84430.1	0.611029	2	Bacteria
ACD84437.1	0.604009	2	Bacteria
ACD84438.1	0.575259	2	Bacteria
ACD84443.1	0.607442	2	Bacteria
ACD84452.1	0.559101	2	Bacteria
ACD84466.1	0.593695	2	Bacteria
ACD84484.1	0.408954	2	Bacteria
ACD84516.1	0.588326	2	Bacteria
ACD83199.1	0.53906	203682	Planctomycetes
ACD84037.1	0.548003	203682	Planctomycetes
ACD83143.1	0.544405	241192	Thermodesulfatator
ACD83505.1	0.609962	2528026	Maioricimonas rarisocia
ACD82984.1	0.591113	28216	Betaproteobacteria
ACD84294.1	0.526404	286	Pseudomonas
ACD83871.1	0.516308	292628	Anaerolineaceae
ACD83315.1	0.591552	32064	Chloroflexales
ACD83959.1	0.580786	32069	Aquificales
ACD83526.1	0.551828	335543	Syntrophobacter fumaroxidans MPOB
ACD82462.1	0.592411	356	Rhizobiales
ACD82954.1	0.564	403	Methylococcaceae
ACD84207.1	0.53474	403	Methylococcaceae
ACD84191.1	0.526106	555779	Desulfonatronospira thiodismutans ASO3-1
ACD84192.1	0.579574	555779	Desulfonatronospira thiodismutans ASO3-1
ACD83282.1	0.59787	608538	Hydrogenobacter thermophilus TK-6
ACD82647.1	0.568612	68336	Bacteroidetes/Chlorobi group
ACD83734.1	0.552564	68336	Bacteroidetes/Chlorobi group
QDQ42513.1	0.579972	119977	Acidithiobacillus
QDQ41536.1	0.513	1224	Proteobacteria
QDQ41570.1	0.57323	1224	Proteobacteria
QDQ41571.1	0.575002	1224	Proteobacteria
QDQ41679.1	0.556112	1224	Proteobacteria
QDQ41686.1	0.459742	1224	Proteobacteria
QDQ41687.1	0.456815	1224	Proteobacteria
QDQ41692.1	0.375421	1224	Proteobacteria
QDQ41693.1	0.540175	1224	Proteobacteria
QDQ41696.1	0.502637	1224	Proteobacteria
QDQ41697.1	0.468251	1224	Proteobacteria
QDQ41702.1	0.610532	1224	Proteobacteria
QDQ41704.1	0.582573	1224	Proteobacteria
QDQ41705.1	0.613014	1224	Proteobacteria
QDQ41706.1	0.523364	1224	Proteobacteria
QDQ41707.1	0.613821	1224	Proteobacteria
QDQ41709.1	0.607691	1224	Proteobacteria
QDQ41710.1	0.599602	1224	Proteobacteria
QDQ41711.1	0.509048	1224	Proteobacteria
QDQ41712.1	0.540646	1224	Proteobacteria
QDQ41713.1	0.434152	1224	Proteobacteria
QDQ41715.1	0.535115	1224	Proteobacteria
QDQ41716.1	0.523762	1224	Proteobacteria
QDQ41775.1	0.578742	1224	Proteobacteria
QDQ41876.1	0.530071	1224	Proteobacteria
QDQ41971.1	0.567163	1224	Proteobacteria
QDQ41987.1	0.609271	1224	Proteobacteria
QDQ42073.1	0.517296	1224	Proteobacteria
QDQ42155.1	0.574907	1224	Proteobacteria
QDQ42165.1	0.510724	1224	Proteobacteria
QDQ42166.1	0.611497	1224	Proteobacteria
QDQ42167.1	0.577842	1224	Proteobacteria
QDQ42177.1	0.533727	1224	Proteobacteria
QDQ42230.1	0.576458	1224	Proteobacteria
QDQ42232.1	0.586021	1224	Proteobacteria
QDQ42337.1	0.595853	1224	Proteobacteria
QDQ42367.1	0.598106	1224	Proteobacteria
QDQ42453.1	0.613314	1224	Proteobacteria
QDQ42557.1	0.533083	1224	Proteobacteria
QDQ42735.1	0.600251	1224	Proteobacteria
QDQ42738.1	0.579339	1224	Proteobacteria
QDQ42748.1	0.603355	1224	Proteobacteria
QDQ42841.1	0.608867	1224	Proteobacteria
QDQ42935.1	0.499641	1224	Proteobacteria
QDQ42970.1	0.517474	1224	Proteobacteria
QDQ43064.1	0.51881	1224	Proteobacteria
QDQ43099.1	0.586106	1224	Proteobacteria
QDQ43104.1	0.597702	1224	Proteobacteria
QDQ43243.1	0.557979	1230846	Acidobacteria bacterium AB60
QDQ42497.1	0.530774	1234	Nitrospira
QDQ42751.1	0.597611	1234	Nitrospira
QDQ41560.1	0.553926	1236	Gammaproteobacteria
QDQ41975.1	0.573695	1239	Firmicutes
QDQ42791.1	0.52776	1239	Firmicutes
QDQ42801.1	0.591437	1239	Firmicutes
QDQ43251.1	0.576115	1239	Firmicutes
QDQ41301.1	0.558932	131567	cellular organisms
QDQ41329.1	0.565734	131567	cellular organisms
QDQ41361.1	0.4752	131567	cellular organisms
QDQ41399.1	0.571839	131567	cellular organisms
QDQ41414.1	0.554438	131567	cellular organisms
QDQ41426.1	0.566774	131567	cellular organisms
QDQ41445.1	0.589061	131567	cellular organisms
QDQ41463.1	0.584484	131567	cellular organisms
QDQ41524.1	0.548915	131567	cellular organisms
QDQ41528.1	0.594768	131567	cellular organisms
QDQ41643.1	0.555305	131567	cellular organisms
QDQ41698.1	0.575129	131567	cellular organisms
QDQ41727.1	0.613993	131567	cellular organisms
QDQ41738.1	0.590455	131567	cellular organisms
QDQ41741.1	0.592678	131567	cellular organisms
QDQ41769.1	0.569085	131567	cellular organisms
QDQ41773.1	0.418103	131567	cellular organisms
QDQ41778.1	0.585692	131567	cellular organisms
QDQ41926.1	0.544422	131567	cellular organisms
QDQ41928.1	0.60299	131567	cellular organisms
QDQ41951.1	0.540791	131567	cellular organisms
QDQ41956.1	0.544659	131567	cellular organisms
QDQ41990.1	0.582694	131567	cellular organisms
QDQ42100.1	0.586722	131567	cellular organisms
QDQ42162.1	0.471103	131567	cellular organisms
QDQ42249.1	0.522073	131567	cellular organisms
QDQ42308.1	0.545268	131567	cellular organisms
QDQ42427.1	0.598646	131567	cellular organisms
QDQ42446.1	0.599933	131567	cellular organisms
QDQ42465.1	0.493763	131567	cellular organisms
QDQ42474.1	0.516982	131567	cellular organisms
QDQ42568.1	0.517752	131567	cellular organisms
QDQ42613.1	0.511917	131567	cellular organisms
QDQ42668.1	0.570222	131567	cellular organisms
QDQ42712.1	0.533383	131567	cellular organisms
QDQ42802.1	0.576264	131567	cellular organisms
QDQ42925.1	0.543039	131567	cellular organisms
QDQ43012.1	0.538466	131567	cellular organisms
QDQ43093.1	0.588723	131567	cellular organisms
QDQ43187.1	0.596247	131567	cellular organisms
QDQ43236.1	0.527887	131567	cellular organisms
QDQ43263.1	0.496831	131567	cellular organisms
QDQ43299.1	0.58435	131567	cellular organisms
QDQ43304.1	0.613083	131567	cellular organisms
QDQ43380.1	0.585724	131567	cellular organisms
QDQ42543.1	0.50457	135618	Methylococcales
QDQ42326.1	0.599813	1385	Bacillales
QDQ42890.1	0.509023	1695218	Paenibacillus sp. 32O-W
QDQ42554.1	0.565749	1783257	PVC group
QDQ41815.1	0.572821	1783272	Terrabacteria group
QDQ42065.1	0.332927	1783272	Terrabacteria group
QDQ42068.1	0.561291	1783272	Terrabacteria group
QDQ42239.1	0.58457	1783272	Terrabacteria group
QDQ42589.1	0.535493	1783272	Terrabacteria group
QDQ42867.1	0.601413	1783272	Terrabacteria group
QDQ43348.1	0.580048	1783272	Terrabacteria group
QDQ41846.1	0.501506	186801	Clostridia
QDQ41429.1	0.606368	188786	Thermaceae
QDQ41432.1	0.550295	188786	Thermaceae
QDQ42926.1	0.591067	188787	Deinococci
QDQ43324.1	0.556048	188787	Deinococci
QDQ41267.1	0.531023	2	Bacteria
QDQ41276.1	0.572716	2	Bacteria
QDQ41282.1	0.559466	2	Bacteria
QDQ41283.1	0.511577	2	Bacteria
QDQ41293.1	0.492918	2	Bacteria
QDQ41300.1	0.497417	2	Bacteria
QDQ41303.1	0.611459	2	Bacteria
QDQ41324.1	0.523587	2	Bacteria
QDQ41332.1	0.501996	2	Bacteria
QDQ41355.1	0.504035	2	Bacteria
QDQ41363.1	0.568705	2	Bacteria
QDQ41369.1	0.558312	2	Bacteria
QDQ41386.1	0.591776	2	Bacteria
QDQ41390.1	0.530578	2	Bacteria
QDQ41395.1	0.523282	2	Bacteria
QDQ41398.1	0.531923	2	Bacteria
QDQ41403.1	0.546378	2	Bacteria
QDQ41408.1	0.584957	2	Bacteria
QDQ41428.1	0.575467	2	Bacteria
QDQ41450.1	0.547123	2	Bacteria
QDQ41467.1	0.574432	2	Bacteria
QDQ41469.1	0.568406	2	Bacteria
QDQ41484.1	0.607853	2	Bacteria
QDQ41488.1	0.610249	2	Bacteria
QDQ41502.1	0.52867	2	Bacteria
QDQ41507.1	0.588018	2	Bacteria
QDQ41530.1	0.584784	2	Bacteria
QDQ41531.1	0.608996	2	Bacteria
QDQ41534.1	0.613635	2	Bacteria
QDQ41547.1	0.596982	2	Bacteria
QDQ41557.1	0.571246	2	Bacteria
QDQ41566.1	0.613814	2	Bacteria
QDQ41578.1	0.526562	2	Bacteria
QDQ41580.1	0.601126	2	Bacteria
QDQ41608.1	0.498342	2	Bacteria
QDQ41629.1	0.500231	2	Bacteria
QDQ41630.1	0.565541	2	Bacteria
QDQ41631.1	0.505494	2	Bacteria
QDQ41641.1	0.564801	2	Bacteria
QDQ41651.1	0.549448	2	Bacteria
QDQ41655.1	0.541992	2	Bacteria
QDQ41660.1	0.560396	2	Bacteria
QDQ41677.1	0.539133	2	Bacteria
QDQ41680.1	0.581044	2	Bacteria
QDQ41682.1	0.320901	2	Bacteria
QDQ41688.1	0.502212	2	Bacteria
QDQ41689.1	0.523762	2	Bacteria
QDQ41690.1	0.585043	2	Bacteria
QDQ41691.1	0.599368	2	Bacteria
QDQ41719.1	0.584704	2	Bacteria
QDQ41720.1	0.515269	2	Bacteria
QDQ41725.1	0.569249	2	Bacteria
QDQ41729.1	0.583484	2	Bacteria
QDQ41746.1	0.54191	2	Bacteria
QDQ41754.1	0.599881	2	Bacteria
QDQ41756.1	0.523466	2	Bacteria
QDQ41763.1	0.583773	2	Bacteria
QDQ41768.1	0.562383	2	Bacteria
QDQ41774.1	0.613855	2	Bacteria
QDQ41782.1	0.59905	2	Bacteria
QDQ41783.1	0.605126	2	Bacteria
QDQ41791.1	0.509416	2	Bacteria
QDQ41793.1	0.576695	2	Bacteria
QDQ41795.1	0.599396	2	Bacteria
QDQ41802.1	0.532921	2	Bacteria
QDQ41803.1	0.558003	2	Bacteria
QDQ41812.1	0.613569	2	Bacteria
QDQ41827.1	0.570383	2	Bacteria
QDQ41828.1	0.593304	2	Bacteria
QDQ41832.1	0.528625	2	Bacteria
QDQ41847.1	0.590721	2	Bacteria
QDQ41848.1	0.533219	2	Bacteria
QDQ41868.1	0.61162	2	Bacteria
QDQ41869.1	0.564792	2	Bacteria
QDQ41870.1	0.503747	2	Bacteria
QDQ41872.1	0.559186	2	Bacteria
QDQ41878.1	0.598357	2	Bacteria
QDQ41879.1	0.52258	2	Bacteria
QDQ41880.1	0.56454	2	Bacteria
QDQ41881.1	0.474474	2	Bacteria
QDQ41882.1	0.572238	2	Bacteria
QDQ41883.1	0.496544	2	Bacteria
QDQ41897.1	0.562181	2	Bacteria
QDQ41900.1	0.5235	2	Bacteria
QDQ41908.1	0.611496	2	Bacteria
QDQ41909.1	0.542941	2	Bacteria
QDQ41920.1	0.506002	2	Bacteria
QDQ41922.1	0.577785	2	Bacteria
QDQ41923.1	0.404549	2	Bacteria
QDQ41924.1	0.552656	2	Bacteria
QDQ41936.1	0.609262	2	Bacteria
QDQ41980.1	0.590487	2	Bacteria
QDQ41982.1	0.5899	2	Bacteria
QDQ41983.1	0.570802	2	Bacteria
QDQ41985.1	0.591161	2	Bacteria
QDQ41997.1	0.613932	2	Bacteria
QDQ42000.1	0.594182	2	Bacteria
QDQ42002.1	0.510793	2	Bacteria
QDQ42006.1	0.515823	2	Bacteria
QDQ42019.1	0.559218	2	Bacteria
QDQ42030.1	0.540955	2	Bacteria
QDQ42064.1	0.557692	2	Bacteria
QDQ42066.1	0.350916	2	Bacteria
QDQ42067.1	0.557213	2	Bacteria
QDQ42075.1	0.605586	2	Bacteria
QDQ42076.1	0.568344	2	Bacteria
QDQ42077.1	0.413354	2	Bacteria
QDQ42078.1	0.538433	2	Bacteria
QDQ42088.1	0.547077	2	Bacteria
QDQ42089.1	0.574161	2	Bacteria
QDQ42150.1	0.553438	2	Bacteria
QDQ42151.1	0.523216	2	Bacteria
QDQ42154.1	0.607813	2	Bacteria
QDQ42157.1	0.546407	2	Bacteria
QDQ42159.1	0.502698	2	Bacteria
QDQ42160.1	0.528943	2	Bacteria
QDQ42161.1	0.569568	2	Bacteria
QDQ42163.1	0.589691	2	Bacteria
QDQ42193.1	0.592201	2	Bacteria
QDQ42201.1	0.459546	2	Bacteria
QDQ42219.1	0.511481	2	Bacteria
QDQ42231.1	0.547829	2	Bacteria
QDQ42240.1	0.602435	2	Bacteria
QDQ42241.1	0.597943	2	Bacteria
QDQ42242.1	0.544741	2	Bacteria
QDQ42243.1	0.550841	2	Bacteria
QDQ42245.1	0.577857	2	Bacteria
QDQ42247.1	0.588166	2	Bacteria
QDQ42255.1	0.525501	2	Bacteria
QDQ42259.1	0.605674	2	Bacteria
QDQ42265.1	0.522798	2	Bacteria
QDQ42266.1	0.602053	2	Bacteria
QDQ42269.1	0.602299	2	Bacteria
QDQ42272.1	0.587126	2	Bacteria
QDQ42273.1	0.610422	2	Bacteria
QDQ42281.1	0.590186	2	Bacteria
QDQ42301.1	0.549344	2	Bacteria
QDQ42305.1	0.55243	2	Bacteria
QDQ42307.1	0.578713	2	Bacteria
QDQ42316.1	0.582587	2	Bacteria
QDQ42317.1	0.517515	2	Bacteria
QDQ42318.1	0.603056	2	Bacteria
QDQ42319.1	0.57466	2	Bacteria
QDQ42322.1	0.60866	2	Bacteria
QDQ42323.1	0.510302	2	Bacteria
QDQ42328.1	0.583073	2	Bacteria
QDQ42329.1	0.58364	2	Bacteria
QDQ42333.1	0.589062	2	Bacteria
QDQ42342.1	0.606663	2	Bacteria
QDQ42348.1	0.609186	2	Bacteria
QDQ42353.1	0.553765	2	Bacteria
QDQ42356.1	0.524335	2	Bacteria
QDQ42373.1	0.553063	2	Bacteria
QDQ42421.1	0.561092	2	Bacteria
QDQ42447.1	0.61342	2	Bacteria
QDQ42450.1	0.55022	2	Bacteria
QDQ42451.1	0.581337	2	Bacteria
QDQ42454.1	0.599501	2	Bacteria
QDQ42455.1	0.510439	2	Bacteria
QDQ42456.1	0.5795	2	Bacteria
QDQ42461.1	0.584959	2	Bacteria
QDQ42464.1	0.551886	2	Bacteria
QDQ42479.1	0.437793	2	Bacteria
QDQ42480.1	0.407358	2	Bacteria
QDQ42488.1	0.611097	2	Bacteria
QDQ42498.1	0.522683	2	Bacteria
QDQ42501.1	0.595871	2	Bacteria
QDQ42502.1	0.582417	2	Bacteria
QDQ42503.1	0.541495	2	Bacteria
QDQ42541.1	0.544587	2	Bacteria
QDQ42542.1	0.526753	2	Bacteria
QDQ42547.1	0.591465	2	Bacteria
QDQ42558.1	0.359542	2	Bacteria
QDQ42559.1	0.362607	2	Bacteria
QDQ42561.1	0.60418	2	Bacteria
QDQ42569.1	0.510427	2	Bacteria
QDQ42570.1	0.581347	2	Bacteria
QDQ42576.1	0.504111	2	Bacteria
QDQ42580.1	0.505918	2	Bacteria
QDQ42581.1	0.59993	2	Bacteria
QDQ42598.1	0.539119	2	Bacteria
QDQ42604.1	0.603155	2	Bacteria
QDQ42616.1	0.545898	2	Bacteria
QDQ42625.1	0.534784	2	Bacteria
QDQ42631.1	0.518234	2	Bacteria
QDQ42632.1	0.547842	2	Bacteria
QDQ42633.1	0.557161	2	Bacteria
QDQ42640.1	0.56436	2	Bacteria
QDQ42657.1	0.560454	2	Bacteria
QDQ42670.1	0.583761	2	Bacteria
QDQ42695.1	0.576742	2	Bacteria
QDQ42707.1	0.598604	2	Bacteria
QDQ42714.1	0.544052	2	Bacteria
QDQ42715.1	0.544563	2	Bacteria
QDQ42723.1	0.557244	2	Bacteria
QDQ42734.1	0.599201	2	Bacteria
QDQ42737.1	0.612185	2	Bacteria
QDQ42744.1	0.571722	2	Bacteria
QDQ42745.1	0.568782	2	Bacteria
QDQ42749.1	0.61086	2	Bacteria
QDQ42752.1	0.529771	2	Bacteria
QDQ42759.1	0.595206	2	Bacteria
QDQ42760.1	0.591922	2	Bacteria
QDQ42782.1	0.58676	2	Bacteria
QDQ42814.1	0.55247	2	Bacteria
QDQ42833.1	0.591874	2	Bacteria
QDQ42837.1	0.500985	2	Bacteria
QDQ42840.1	0.543994	2	Bacteria
QDQ42843.1	0.454618	2	Bacteria
QDQ42855.1	0.610324	2	Bacteria
QDQ42874.1	0.612775	2	Bacteria
QDQ42896.1	0.516043	2	Bacteria
QDQ42905.1	0.50125	2	Bacteria
QDQ42908.1	0.525698	2	Bacteria
QDQ42911.1	0.605902	2	Bacteria
QDQ42918.1	0.590961	2	Bacteria
QDQ42919.1	0.578491	2	Bacteria
QDQ42920.1	0.583054	2	Bacteria
QDQ42927.1	0.527319	2	Bacteria
QDQ42928.1	0.569031	2	Bacteria
QDQ42929.1	0.586689	2	Bacteria
QDQ42931.1	0.596679	2	Bacteria
QDQ42932.1	0.578274	2	Bacteria
QDQ42938.1	0.521293	2	Bacteria
QDQ42947.1	0.563717	2	Bacteria
QDQ42969.1	0.588378	2	Bacteria
QDQ42971.1	0.583964	2	Bacteria
QDQ42974.1	0.511509	2	Bacteria
QDQ42975.1	0.585035	2	Bacteria
QDQ42976.1	0.608244	2	Bacteria
QDQ42996.1	0.548351	2	Bacteria
QDQ42998.1	0.599874	2	Bacteria
QDQ43002.1	0.57088	2	Bacteria
QDQ43003.1	0.607191	2	Bacteria
QDQ43004.1	0.568066	2	Bacteria
QDQ43016.1	0.527476	2	Bacteria
QDQ43021.1	0.442971	2	Bacteria
QDQ43022.1	0.543242	2	Bacteria
QDQ43024.1	0.525545	2	Bacteria
QDQ43028.1	0.591992	2	Bacteria
QDQ43036.1	0.58982	2	Bacteria
QDQ43052.1	0.551621	2	Bacteria
QDQ43054.1	0.533521	2	Bacteria
QDQ43060.1	0.552298	2	Bacteria
QDQ43067.1	0.501888	2	Bacteria
QDQ43068.1	0.455752	2	Bacteria
QDQ43069.1	0.540793	2	Bacteria
QDQ43070.1	0.57868	2	Bacteria
QDQ43073.1	0.517395	2	Bacteria
QDQ43088.1	0.594865	2	Bacteria
QDQ43103.1	0.586364	2	Bacteria
QDQ43105.1	0.581085	2	Bacteria
QDQ43124.1	0.575853	2	Bacteria
QDQ43125.1	0.603183	2	Bacteria
QDQ43127.1	0.532429	2	Bacteria
QDQ43135.1	0.501058	2	Bacteria
QDQ43157.1	0.555897	2	Bacteria
QDQ43165.1	0.60131	2	Bacteria
QDQ43167.1	0.613507	2	Bacteria
QDQ43176.1	0.578002	2	Bacteria
QDQ43177.1	0.554457	2	Bacteria
QDQ43178.1	0.606013	2	Bacteria
QDQ43179.1	0.575414	2	Bacteria
QDQ43201.1	0.524822	2	Bacteria
QDQ43207.1	0.595469	2	Bacteria
QDQ43217.1	0.565213	2	Bacteria
QDQ43224.1	0.531069	2	Bacteria
QDQ43235.1	0.564945	2	Bacteria
QDQ43249.1	0.546852	2	Bacteria
QDQ43264.1	0.522334	2	Bacteria
QDQ43269.1	0.598989	2	Bacteria
QDQ43271.1	0.611876	2	Bacteria
QDQ43274.1	0.568624	2	Bacteria
QDQ43276.1	0.563934	2	Bacteria
QDQ43278.1	0.55238	2	Bacteria
QDQ43291.1	0.511988	2	Bacteria
QDQ43293.1	0.524036	2	Bacteria
QDQ43295.1	0.605533	2	Bacteria
QDQ43296.1	0.569716	2	Bacteria
QDQ43300.1	0.521753	2	Bacteria
QDQ43301.1	0.607692	2	Bacteria
QDQ43302.1	0.564842	2	Bacteria
QDQ43303.1	0.492999	2	Bacteria
QDQ43305.1	0.612127	2	Bacteria
QDQ43307.1	0.530375	2	Bacteria
QDQ43309.1	0.568559	2	Bacteria
QDQ43319.1	0.503277	2	Bacteria
QDQ43339.1	0.41776	2	Bacteria
QDQ43351.1	0.553713	2	Bacteria
QDQ43369.1	0.589792	2	Bacteria
QDQ41988.1	0.547491	201174	Actinobacteria
QDQ41587.1	0.546105	203682	Planctomycetes
QDQ42371.1	0.538891	203682	Planctomycetes
QDQ42688.1	0.611269	2528026	Maioricimonas rarisocia
QDQ42912.1	0.502426	28211	Alphaproteobacteria
QDQ43046.1	0.507315	28231	Geobacter
QDQ42478.1	0.591504	32064	Chloroflexales
QDQ41813.1	0.603529	356	Rhizobiales
QDQ41433.1	0.555767	403	Methylococcaceae
QDQ42169.1	0.572763	403	Methylococcaceae
QDQ41454.1	0.52658	555779	Desulfonatronospira thiodismutans ASO3-1
QDQ41455.1	0.576315	555779	Desulfonatronospira thiodismutans ASO3-1
QDQ42302.1	0.605526	563843	Rhodothermaceae
QDQ42508.1	0.570594	575540	Isosphaera pallida ATCC 43644
QDQ43045.1	0.527723	66848	Desulfonatronum
QDQ41907.1	0.572385	68336	Bacteroidetes/Chlorobi group
QDQ41930.1	0.552195	68336	Bacteroidetes/Chlorobi group
QSR87139.1	0.500913	1117	Cyanobacteria
QSR86200.1	0.589472	1224	Proteobacteria
QSR86336.1	0.385197	1224	Proteobacteria
QSR86337.1	0.539821	1224	Proteobacteria
QSR86340.1	0.510775	1224	Proteobacteria
QSR86342.1	0.582074	1224	Proteobacteria
QSR86344.1	0.61169	1224	Proteobacteria
QSR86348.1	0.614072	1224	Proteobacteria
QSR86350.1	0.602162	1224	Proteobacteria
QSR86351.1	0.597925	1224	Proteobacteria
QSR86352.1	0.51126	1224	Proteobacteria
QSR86353.1	0.547177	1224	Proteobacteria
QSR86354.1	0.494452	1224	Proteobacteria
QSR86355.1	0.535966	1224	Proteobacteria
QSR86379.1	0.534362	1224	Proteobacteria
QSR86386.1	0.497899	1224	Proteobacteria
QSR86538.1	0.610652	1224	Proteobacteria
QSR86539.1	0.603382	1224	Proteobacteria
QSR86631.1	0.59806	1224	Proteobacteria
QSR86650.1	0.506753	1224	Proteobacteria
QSR86651.1	0.612731	1224	Proteobacteria
QSR86652.1	0.589181	1224	Proteobacteria
QSR86659.1	0.52631	1224	Proteobacteria
QSR86826.1	0.600415	1224	Proteobacteria
QSR86902.1	0.613737	1224	Proteobacteria
QSR87023.1	0.574485	1224	Proteobacteria
QSR87110.1	0.565501	1224	Proteobacteria
QSR87152.1	0.6098	1224	Proteobacteria
QSR87153.1	0.46201	1224	Proteobacteria
QSR87168.1	0.613283	1224	Proteobacteria
QSR87175.1	0.511562	1224	Proteobacteria
QSR87180.1	0.573625	1224	Proteobacteria
QSR87224.1	0.473695	1224	Proteobacteria
QSR87250.1	0.535464	1224	Proteobacteria
QSR87354.1	0.492066	1224	Proteobacteria
QSR87355.1	0.447861	1224	Proteobacteria
QSR87356.1	0.486172	1224	Proteobacteria
QSR87362.1	0.567038	1224	Proteobacteria
QSR87401.1	0.594747	1224	Proteobacteria
QSR87452.1	0.565853	1224	Proteobacteria
QSR87482.1	0.50786	1224	Proteobacteria
QSR87791.1	0.469899	1224	Proteobacteria
QSR87612.1	0.514256	1230846	Acidobacteria bacterium AB60
QSR86536.1	0.596779	1234	Nitrospira
QSR86944.1	0.52851	1234	Nitrospira
QSR86704.1	0.580421	1236	Gammaproteobacteria
QSR87461.1	0.551462	1236	Gammaproteobacteria
QSR87169.1	0.52472	1239	Firmicutes
QSR87560.1	0.523599	1239	Firmicutes
QSR87617.1	0.560984	1239	Firmicutes
QSR87646.1	0.588917	1303518	Chthonomonas calidirosea T49
QSR85910.1	0.586507	131567	cellular organisms
QSR85913.1	0.520421	131567	cellular organisms
QSR85914.1	0.58156	131567	cellular organisms
QSR85956.1	0.552828	131567	cellular organisms
QSR85973.1	0.576102	131567	cellular organisms
QSR85991.1	0.490688	131567	cellular organisms
QSR86006.1	0.54627	131567	cellular organisms
QSR86053.1	0.569842	131567	cellular organisms
QSR86073.1	0.558244	131567	cellular organisms
QSR86076.1	0.566	131567	cellular organisms
QSR86087.1	0.605741	131567	cellular organisms
QSR86089.1	0.568175	131567	cellular organisms
QSR86119.1	0.555143	131567	cellular organisms
QSR86205.1	0.585585	131567	cellular organisms
QSR86320.1	0.533337	131567	cellular organisms
QSR86341.1	0.606695	131567	cellular organisms
QSR86365.1	0.612996	131567	cellular organisms
QSR86440.1	0.399904	131567	cellular organisms
QSR86449.1	0.535287	131567	cellular organisms
QSR86451.1	0.596802	131567	cellular organisms
QSR86462.1	0.59971	131567	cellular organisms
QSR86473.1	0.613986	131567	cellular organisms
QSR86552.1	0.582588	131567	cellular organisms
QSR86585.1	0.589371	131567	cellular organisms
QSR86693.1	0.531118	131567	cellular organisms
QSR86720.1	0.544904	131567	cellular organisms
QSR86752.1	0.516125	131567	cellular organisms
QSR86777.1	0.532407	131567	cellular organisms
QSR86785.1	0.509687	131567	cellular organisms
QSR86807.1	0.508186	131567	cellular organisms
QSR86880.1	0.588153	131567	cellular organisms
QSR86895.1	0.574744	131567	cellular organisms
QSR86912.1	0.556241	131567	cellular organisms
QSR86921.1	0.511432	131567	cellular organisms
QSR87058.1	0.565232	131567	cellular organisms
QSR87060.1	0.57874	131567	cellular organisms
QSR87155.1	0.584722	131567	cellular organisms
QSR87185.1	0.513689	131567	cellular organisms
QSR87194.1	0.524525	131567	cellular organisms
QSR87205.1	0.574662	131567	cellular organisms
QSR87249.1	0.566032	131567	cellular organisms
QSR87286.1	0.5068	131567	cellular organisms
QSR87293.1	0.611867	131567	cellular organisms
QSR87312.1	0.584484	131567	cellular organisms
QSR87329.1	0.522943	131567	cellular organisms
QSR87334.1	0.591028	131567	cellular organisms
QSR87337.1	0.568872	131567	cellular organisms
QSR87398.1	0.562706	131567	cellular organisms
QSR87447.1	0.594821	131567	cellular organisms
QSR87524.1	0.586158	131567	cellular organisms
QSR87532.1	0.590708	131567	cellular organisms
QSR87673.1	0.555069	131567	cellular organisms
QSR87687.1	0.440369	131567	cellular organisms
QSR87721.1	0.535368	131567	cellular organisms
QSR87733.1	0.592908	131567	cellular organisms
QSR87735.1	0.523829	131567	cellular organisms
QSR86793.1	0.598976	1385	Bacillales
QSR86299.1	0.569077	1783272	Terrabacteria group
QSR86712.1	0.593678	1783272	Terrabacteria group
QSR87111.1	0.525876	1783272	Terrabacteria group
QSR87162.1	0.526955	1783272	Terrabacteria group
QSR87251.1	0.567613	1783272	Terrabacteria group
QSR87495.1	0.546991	1783272	Terrabacteria group
QSR87555.1	0.518339	1783272	Terrabacteria group
QSR87814.1	0.519124	1783272	Terrabacteria group
QSR85953.1	0.588421	188786	Thermaceae
QSR86460.1	0.589641	188786	Thermaceae
QSR87554.1	0.546149	188786	Thermaceae
QSR87557.1	0.605613	188786	Thermaceae
QSR85931.1	0.580965	188787	Deinococci
QSR85906.1	0.602062	2	Bacteria
QSR85907.1	0.575907	2	Bacteria
QSR85912.1	0.608414	2	Bacteria
QSR85918.1	0.559671	2	Bacteria
QSR85930.1	0.569204	2	Bacteria
QSR85946.1	0.410293	2	Bacteria
QSR85967.1	0.588462	2	Bacteria
QSR85979.1	0.564191	2	Bacteria
QSR85987.1	0.566675	2	Bacteria
QSR85992.1	0.553679	2	Bacteria
QSR85993.1	0.508674	2	Bacteria
QSR86000.1	0.485508	2	Bacteria
QSR86005.1	0.53015	2	Bacteria
QSR86027.1	0.559149	2	Bacteria
QSR86050.1	0.512498	2	Bacteria
QSR86054.1	0.522886	2	Bacteria
QSR86058.1	0.570959	2	Bacteria
QSR86066.1	0.555722	2	Bacteria
QSR86097.1	0.582348	2	Bacteria
QSR86128.1	0.582455	2	Bacteria
QSR86129.1	0.604915	2	Bacteria
QSR86130.1	0.582725	2	Bacteria
QSR86138.1	0.607756	2	Bacteria
QSR86140.1	0.593667	2	Bacteria
QSR86147.1	0.54978	2	Bacteria
QSR86175.1	0.53431	2	Bacteria
QSR86177.1	0.600652	2	Bacteria
QSR86192.1	0.551628	2	Bacteria
QSR86195.1	0.576487	2	Bacteria
QSR86196.1	0.597767	2	Bacteria
QSR86213.1	0.583549	2	Bacteria
QSR86227.1	0.592033	2	Bacteria
QSR86228.1	0.460316	2	Bacteria
QSR86234.1	0.554115	2	Bacteria
QSR86240.1	0.555554	2	Bacteria
QSR86248.1	0.524826	2	Bacteria
QSR86262.1	0.590762	2	Bacteria
QSR86270.1	0.585957	2	Bacteria
QSR86275.1	0.520366	2	Bacteria
QSR86279.1	0.527591	2	Bacteria
QSR86286.1	0.585806	2	Bacteria
QSR86287.1	0.605362	2	Bacteria
QSR86288.1	0.56672	2	Bacteria
QSR86291.1	0.597517	2	Bacteria
QSR86296.1	0.613865	2	Bacteria
QSR86330.1	0.596806	2	Bacteria
QSR86331.1	0.558077	2	Bacteria
QSR86332.1	0.5393	2	Bacteria
QSR86333.1	0.601327	2	Bacteria
QSR86335.1	0.591921	2	Bacteria
QSR86345.1	0.568678	2	Bacteria
QSR86346.1	0.610562	2	Bacteria
QSR86347.1	0.532438	2	Bacteria
QSR86358.1	0.531451	2	Bacteria
QSR86363.1	0.571836	2	Bacteria
QSR86373.1	0.501889	2	Bacteria
QSR86374.1	0.574331	2	Bacteria
QSR86375.1	0.565778	2	Bacteria
QSR86376.1	0.495688	2	Bacteria
QSR86378.1	0.556741	2	Bacteria
QSR86381.1	0.600103	2	Bacteria
QSR86382.1	0.526592	2	Bacteria
QSR86383.1	0.562838	2	Bacteria
QSR86384.1	0.48351	2	Bacteria
QSR86385.1	0.581841	2	Bacteria
QSR86398.1	0.523404	2	Bacteria
QSR86401.1	0.600169	2	Bacteria
QSR86405.1	0.59889	2	Bacteria
QSR86408.1	0.506201	2	Bacteria
QSR86434.1	0.611891	2	Bacteria
QSR86444.1	0.521201	2	Bacteria
QSR86445.1	0.592229	2	Bacteria
QSR86446.1	0.409424	2	Bacteria
QSR86447.1	0.556445	2	Bacteria
QSR86453.1	0.580086	2	Bacteria
QSR86457.1	0.586642	2	Bacteria
QSR86458.1	0.576295	2	Bacteria
QSR86459.1	0.508645	2	Bacteria
QSR86466.1	0.568586	2	Bacteria
QSR86467.1	0.584895	2	Bacteria
QSR86468.1	0.591851	2	Bacteria
QSR86476.1	0.594175	2	Bacteria
QSR86477.1	0.500554	2	Bacteria
QSR86480.1	0.502449	2	Bacteria
QSR86491.1	0.560125	2	Bacteria
QSR86502.1	0.539167	2	Bacteria
QSR86535.1	0.519485	2	Bacteria
QSR86555.1	0.512004	2	Bacteria
QSR86562.1	0.541841	2	Bacteria
QSR86626.1	0.557575	2	Bacteria
QSR86627.1	0.518564	2	Bacteria
QSR86630.1	0.610128	2	Bacteria
QSR86633.1	0.533062	2	Bacteria
QSR86644.1	0.520835	2	Bacteria
QSR86645.1	0.519395	2	Bacteria
QSR86646.1	0.570808	2	Bacteria
QSR86647.1	0.50701	2	Bacteria
QSR86648.1	0.591244	2	Bacteria
QSR86673.1	0.604853	2	Bacteria
QSR86678.1	0.460545	2	Bacteria
QSR86705.1	0.506059	2	Bacteria
QSR86706.1	0.562507	2	Bacteria
QSR86713.1	0.601646	2	Bacteria
QSR86714.1	0.587098	2	Bacteria
QSR86715.1	0.509682	2	Bacteria
QSR86716.1	0.54834	2	Bacteria
QSR86718.1	0.5817	2	Bacteria
QSR86731.1	0.607796	2	Bacteria
QSR86736.1	0.5247	2	Bacteria
QSR86737.1	0.601905	2	Bacteria
QSR86739.1	0.605118	2	Bacteria
QSR86742.1	0.58374	2	Bacteria
QSR86743.1	0.611794	2	Bacteria
QSR86750.1	0.590091	2	Bacteria
QSR86769.1	0.539099	2	Bacteria
QSR86770.1	0.605697	2	Bacteria
QSR86772.1	0.558664	2	Bacteria
QSR86776.1	0.585671	2	Bacteria
QSR86784.1	0.569827	2	Bacteria
QSR86786.1	0.556889	2	Bacteria
QSR86787.1	0.582426	2	Bacteria
QSR86790.1	0.606626	2	Bacteria
QSR86794.1	0.572739	2	Bacteria
QSR86795.1	0.581446	2	Bacteria
QSR86796.1	0.577531	2	Bacteria
QSR86797.1	0.583036	2	Bacteria
QSR86800.1	0.591641	2	Bacteria
QSR86804.1	0.600917	2	Bacteria
QSR86813.1	0.610978	2	Bacteria
QSR86814.1	0.54415	2	Bacteria
QSR86817.1	0.517896	2	Bacteria
QSR86832.1	0.600311	2	Bacteria
[truncated: 2,227 more rows]
